# **chromstaR: Tracking combinatorial chromatin state dynamics in space and time**

Aaron Taudt<sup>\*1</sup>, Minh Anh Nguyen<sup>†2</sup>, Matthias Heinig<sup>‡3</sup>, Frank  
Johannes<sup>§4</sup>, and Maria Colomé-Tatché<sup>¶1</sup>

<sup>1</sup>European Research Institute for the Biology of Ageing, University  
of Groningen, University Medical Centre Groningen, A.

Deusinglaan 1, NL-9713 AV, Groningen, The Netherlands

<sup>2</sup>Department of Radiation Oncology, The Netherlands Cancer  
Institute, Amsterdam, The Netherlands

<sup>3</sup>Institute for Computational Biology, Helmholtz Zentrum  
München, Ingolstädter Landstr. 1, 85764, Neuherberg, Germany

<sup>4</sup>Department of Plant Sciences, Hans Eisenmann-Zentrum for  
Agricultural Sciences, Technical University Munich,  
Liesel-Beckmann-Str. 2, 85354, Freising, Germany

February 3, 2016

# Abstract

Post-translational modifications of histone residue tails are an important component of genome regulation. It is becoming increasingly clear that the combinatorial presence and absence of various modifications define discrete chromatin states which determine the functional properties of a locus. An emerging experimental goal is to compare genome-wide chromatin state maps across different conditions, such as experimental treatments, cell-types or developmental time points. Here we present chromstaR, an algorithm for the computational inference of combinatorial chromatin state dynamics across an arbitrary number of conditions. ChromstaR uses a multivariate Hidden Markov Model to assign every genomic region to a discrete combinatorial chromatin state based on the presence/absence of each modification in every condition. This interpretation makes it easy to relate the inferred chromatin states back to the underlying histone modification patterns. Moreover, the algorithm computes the number of combinatorial chromatin states that are present in the genome without having to specify them *a priori*, thus providing an unbiased picture of their genome-wide frequencies. We demonstrate the advantages of chromstaR in the context of three common experimental data scenarios. First, we study how different histone modifications combine to form combinatorial chromatin states in a single tissue. Second, we infer genome-wide patterns of combinatorial state differences between two cell types or conditions. Finally, we study the dynamics of combinatorial chromatin states during tissue differentiation involving up to six differentiation points. chromstaR is a versatile computational tool that facilitates a deeper biological understanding of chromatin organization and dynamics. The algorithm is written in C++ and freely available as an R-package at <https://github.com/ataudt/chromstaR>.

---

\*a.s.taudt@umcg.nl

†anhntm@gmail.com

‡matthias.heinig@helmholtz-muenchen.de

§frank@johanneslab.org

¶m.colome.tatche@umcg.nl

# Introduction

Epigenetic marks such as DNA methylation or histone modifications play a central role in genome regulation. They are involved in a diversity of biological processes such as lineage commitment during development (Mikkelsen et al., 2007), maintenance of cellular identity (Barski et al., 2007; Koch et al., 2007) and silencing of transposable elements (Huda et al., 2010). The modification status of many histone marks has been extensively studied in recent years, first with ChIP-chip and later with ChIP-seq, now the de-facto standard procedure for genome wide mapping of protein-DNA interactions and histone modifications. Since its advent in 2007 (Mikkelsen et al., 2007; Barski et al., 2007; Robertson et al., 2007), ChIP-seq technologies have been widely used to survey genome-wide patterns of histone modifications in a variety of organisms (Pokholok et al., 2005; Rintisch et al., 2014; Barski et al., 2007), cell lines (Bernstein et al., 2012) and tissues (Bernstein et al., 2010; Consortium et al., 2015).

The multitude of possible histone modifications has led to the idea of a “histone code” (Jenuwein and Allis, 2001), a layer of epigenetic information that is encoded by combinatorial patterns of histone modification states (Fig. 1a). Major resources have been allocated in recent years to decipher this code, culminating in projects such as the ENCODE (Hoffman et al., 2013) and Epigenomics Roadmap (Consortium et al., 2015). Following their examples, most experiments nowadays are designed to probe several histone modifications at once, and often in various cell types, strains and at different developmental time points. These types of experiments pose new computational challenges, since initial solutions were designed to analyze one modification and condition at a time, therefore treating them as independent. Indeed, a commonly used strategy has been to perform peak calling for each experiment separately (univariate analysis) and to combine the peak calls post-hoc into combinatorial patterns (Luo et al., 2013; Wang

et al., 2008). This approach is problematic for several reasons: Because of the noise associated with ChIP-seq experiments and peak calling, combining univariate peak calls will lead to the discovery of spurious combinatorial states that do not actually occur in the genome. Furthermore, different tools or parameter settings are often used for different modifications (e.g. peak calling for broad or narrow marks), making the outcome sensitive to parameter changes and control of the overall false discovery rate difficult. Lastly, this approach requires ample time and bioinformatic expertise, rendering it impractical for many experimentalists.

Accurate inferences regarding combinatorial histone modification patterns are necessary to be able to understand the basic principles of chromatin organization and its role in determining gene expression programs. One way forward is to develop computational algorithms that can analyze all measured histone modifications at once (i.e. combinatorial analysis) and across different conditions (i.e. differential analysis). Several such methods have been proposed in recent years, all of which employ graphical probabilistic methods such as Hidden Markov Models (HMM) or dynamic Bayesian networks. ChromHMM (Ernst and Kellis, 2012) employs a multivariate HMM to classify the genome into a preselected number of chromatin states and was used to annotate the epigenome in the ENCODE (Hoffman et al., 2013) and Epigenomics Roadmap (Consortium et al., 2015) projects. Segway (Hoffman et al., 2012) is another tool based on dynamic Bayesian networks that classifies the genome into a preselected number of states. It requires, however, extensive computational resources and special cluster management, limiting its usability. TreeHMM (Biesinger et al., 2013) is an extension of ChromHMM which explicitly takes lineage information into account. Another tool, hiHMM (Sohn et al., 2015), was designed to share state definitions across different genomes. Finally, ChromDiff (Yen and Kellis, 2015) has been proposed for the group-wise comparison of chromatin states between two conditions.

1

2 A major drawback of these approaches is the need to specify the number of distinct  
3 chromatin states beforehand, which is usually not known *a priori*. Furthermore, the  
4 learned states are probabilistic, meaning that each state can consist of multiple and  
5 overlapping combinatorial states (Fig. 1b). This probabilistic state definition is useful  
6 to reduce noise and to identify functionally similar genomic regions for the purpose of an-  
7 notation, but at the same time it obscures a more direct interpretation of combinatorial  
8 states in terms of the presence/absence patterns of the underlying histone modifications.

9

10 To adress some of these issues we developed chromstaR, a method for multivariate  
11 peak- and broad-region calling. chromstaR has the following conceptual advantages:  
12 1) Every genomic region is assigned to a discrete, readily interpretable combinatorial  
13 chromatin state, based on presence/absence of every histone mark. 2) The number of  
14 chromatin states does not have to be preselected but is a result of the analysis. 3) Histone  
15 modifications with narrow and broad profiles can be combined in a joint analysis along  
16 with an arbitrary number of conditions. 4) The same approach can be used for mapping  
17 combinatorial chromatin states in one condition, or for identifying differentially enriched  
18 regions between several conditions, or for both situations combined. 5) Our formalism  
19 offers an elegant way to include replicates as separate experiments without prior merging.

20

21 We demonstrate the advantages of chromstaR in the context of three common ex-  
22 perimental scenarios (Fig. S1b). First, we consider that several histone modifications  
23 have been collected on a single tissue at a given time point (Fig. S1b, Application 1).  
24 The goal is to infer how these different modifications combine to form distinct combi-  
25 natorial chromatin states and to describe their genome-wide distribution. Second, we  
26 consider that several histone modifications have been collected in two different cell types  
27 or conditions (Fig. S1b, Application 2). Here, the goal is to infer genome-wide patterns

1 of combinatorial state differences between cell types or conditions. Third, we consider  
 2 the more complex scenario where several histone modifications have been collected for  
 3 multiple different time points or tissue types (Fig. S1b, Application 3). In this case, the  
 4 goal is to infer how combinatorial chromatin states are modified during tissue differen-  
 5 tiation or development. These three experimental scenarios broadly summarize many of  
 6 the data problems that biologists and bioinformaticians currently face when analyzing  
 7 epigenomic data. We show that chromstaR provides efficient computational solutions to  
 8 these types of data problems, and facilitates deeper biological insights into the dynamic  
 9 co-ordination of combinatorial chromatin states in genome regulation.

## 10 **Results**

### 11 **Brief overview of analytical approach**

12 Consider  $N$  ChIP-seq experiments:  $N$  histone modifications measured in one condition,  
 13 or one histone modification measured in  $N$  conditions, or a combination of the two. After  
 14 mapping the sequencing reads to the reference genome our method can be summarized  
 15 in three steps (Fig. 2): (1) For each ChIP-seq experiment, we partition the genome into  
 16 non-overlapping bins (default 1kb) and count the number of reads that map into each  
 17 bin (i.e. the read count) (Lawrence et al., 2013). (2) For every ChIP-seq experiment,  
 18 we consider that the read count distribution is a two-component mixture of zero-inflated  
 19 negative binomials (Rashid et al., 2011; Spyrou et al., 2009), with one component at  
 20 low number of reads that describes the background noise and one component at high  
 21 number of reads describing the signal. We use a univariate Hidden Markov Model  
 22 (HMM) with two hidden states (i.e. unmodified, modified) to fit the parameters of these  
 23 distributions (van der Graaf et al., 2015). (3) We consider all ChIP-seq experiments at  
 24 once and assume that the multivariate vector of read counts is described by a multivariate  
 25 distribution which is a mixture of  $2^N$  components. We use a multivariate HMM to

1 assign every bin in the genome to one of the multivariate components. The multivariate  
2 emission densities of the multivariate HMM, with marginals equal to the univariate  
3 distributions from step (2), are defined using a Gaussian copula (Sklar, 1959). A detailed  
4 description can be found in **Supplementary Materials**.

## 5 **Application 1: Mapping combinatorial chromatin states in a reference tissue**

6 Lara-Astiaso et al. (Lara-Astiaso et al., 2014) measured four histone modifications  
7 (H3K4me1, H3K4me2, H3K4me3 and H3K27ac) and gene expression in 16 mouse hematopoi-  
8 etic cell lines and their progenitors (Fig. S1). The authors' goal was to document the  
9 dynamic enhancer landscape during hematopoietic differentiation. With four measured  
10 histone modifications there are  $2^4 = 16$  possible combinatorial states defined by the  
11 presence/absence of each of the modifications. In order to provide a snapshot of the  
12 genome-wide distribution of these combinatorial states in a given cell-type, we applied  
13 chromstaR to the ChIP-seq samples collected from monocytes (see Fig. S2 for the analysis  
14 of other cell types). In the following we introduce a shorthand notation where combi-  
15 natorial states are denoted between brackets [ ] and each mark is abbreviated by its  
16 chemical modification. For example, the combination [H3K4me1+H3K4me2+H3K27ac]  
17 will be abbreviated as [me1/2+ac]. If we use the full name of a mark (e.g. "H3K4me1")  
18 we are referring to the mark in a classical, non-combinatorial, context. See Fig. 3d for  
19 all combinations with shorthands.

20  
21 chromstaR found that many of the 16 possible combinatorial states were nearly absent  
22 at the genome-wide scale, with 7 of the 16 states accounting for nearly 100% (99.998%)  
23 of the genome (Fig. 3a). This observation indicates that the "histone code" defined by  
24 these four histone modifications is much less complex than theoretically possible, per-  
25 haps as a result of biochemical constraints on the co-occurrence of certain modifications  
26 on the same or neighboring aminoacid residues. The empty state, which we here define

1 as the simultaneous absence of all measured marks at a given genomic position, was the  
2 most frequent state, covering 93.10% of the genome. The high prevalence of this state  
3 reflects the fact that Lara-Astiaso et al. (Lara-Astiaso et al., 2014) focused on marks  
4 that had previously been shown to occur proximal to genic sequences (Bernstein et al.,  
5 2005; Barski et al., 2007; Koch et al., 2007). Indeed, only 36% of the empty state over-  
6 lapped known genes while the remaining 64% mapped to non-genic regions throughout  
7 the genome, and probably tag other (unmeasured) histone modifications, such as repres-  
8 sive heterochromatin-associated marks. In order to explore this possibility we analyzed  
9 human Hippocampus tissue data from the Epigenomics Roadmap (Consortium et al.,  
10 2015), where seven histone modifications, both expressive and repressive, had been mea-  
11 sured (**Supplementary Materials**). We found in this case that only 21 out of the 128  
12 possible combinatorial states were necessary to explain more than 99% of the epigenome,  
13 and indeed the empty state covered only  $\sim 32\%$  of the genome (Fig. S3).

14  
15 Contrary to the empty state, on average 67.11% (range: 57.34-80.42%) of the genomic  
16 regions found to be in one of the 6 most frequent (non-empty) combinatorial states  
17 in mouse monocytes overlap known genes (Fig. 3b), thus suggesting an active role in  
18 the regulation of gene expression. To assess this, we examined the combinatorial state  
19 profiles of the 6 most frequent states relative to the transcription start site (TSS) of  
20 expressed and non-expressed genes (Fig. 4a). In contrast to non-expressed genes, ex-  
21 pressed genes were clearly characterized by the presence of state [me1/2/3+ac] proximal  
22 to the TSS. This is consistent with previous reports that have used H3K4me3 together  
23 with H3K27ac to tag promoters (Heintzman et al., 2009). However, our analysis also  
24 uncovered a more subtle enrichment of state [me1] shouldering the TSS (Fig. 4a). We  
25 found that 42% of [me1] sites occur in regions directly flanking state [me1/2/3+ac] and  
26 74% of all [me1] can be found within 10kb of [me1/2/3+ac] sites (see Fig. 5 for an ex-  
27 ample). These two states therefore constitute a single, broad chromatin signature that



1 defines a subset of expressed genes. Interestingly, this subset of genes had significantly  
 2 higher expression levels ( $p \approx 10^{-101}$ , t-test) and distinct GO terms compared with genes  
 3 marked only by the active promoter state (i.e. [me1/2/3+ac] at the TSS and no [me1]  
 4 in flanking regions, Fig. 6 and Table 1). This observation suggests that the co-occurrence  
 5 of [me1/2/3+ac] and [me1] in broad regions surrounding the TSS marks what may be  
 6 called “enhanced” active promoters ([me1/2/3+ac]+[me1]).

7  
 8 To compare the results obtained with chromstaR to other computational approaches,  
 9 we analyzed the same datasets using MACS2 (Zhang et al., 2008), one of the most  
 10 widely used univariate peak callers, and ChromHMM (Ernst and Kellis, 2012). When  
 11 using a multivariate segmentation method like ChromHMM, the number of chromatin  
 12 states needs to be decided beforehand, which is difficult as this number is rarely known  
 13 *a priori*. In the absence of detailed guidelines we fitted a 16 state model to the mouse  
 14 hematopoietic data. Our comparison uncovered substantial method-specific differences  
 15 in state frequencies (Fig. 3). Both ChromHMM and MACS2 found all 16 states present in  
 16 the genome with more than 0.01% genome coverage. To understand how state-calls com-  
 17 pared between methods, we evaluated to which extent the states detected by one method  
 18 coincided with those detected by the other method(s) (Fig. S4). Most notable, we found  
 19 that genomic regions corresponding to chromstaR’s active promoter state [me1/2/3+ac]  
 20 were assigned to two alternative states (E7 and E9) by ChromHMM. These latter two  
 21 states were very similar in terms of their emission densities, but significantly different at  
 22 the level of gene expression ( $p \approx 10^{-90}$ , t-test, Fig. 3c). Moreover, chromstaR’s single  
 23 empty state corresponded to two functionally similar (nearly) empty states (E2, E3) de-  
 24 tected by ChromHMM. A third almost empty state E4 with very weak H3K27ac signal  
 25 had slightly higher expression levels than the other two empty states and partially over-  
 26 lapped with chromstaR states [me1] and [me1+ac] (Fig. S4). These state redundancies  
 27 highlight the difficulty in selecting the number of chromatin states for ChromHMM, for

1 without extensive manual curation it is difficult to know if two states are truly redundant  
2 or if they are biologically different on some level.

3

4 Although MACS2 is not designed for multivariate analysis, we constructed *ad hoc*  
5 combinatorial state calls from the univariate analyses obtained from each ChIP-seq ex-  
6 periment. As expected, MACS2 results were noisy: many of the combinatorial states  
7 detected by chromstaR showed very heterogenous state calls with MACS2 (Fig. S4). For  
8 instance, a considerable proportion (45%) of genomic regions detected by chromstaR as  
9 being in the active promoter state [me1/2/3+ac] were assigned to another promoter  
10 state (containing H3K4me3) by MACS2. We suspect that this is due to the limitations  
11 of MACS2 in calling broader marks (e.g. H3K4me1) or moderate enrichment with the  
12 default parameters, which results in frequent missed calls for individual modifications,  
13 and subsequently also in the limited detection of ‘complex’ combinatorial states such as  
14 [me1/2/3+ac] that are defined by the presence of all modifications.

15

16 To better understand the functional implications of the state frequency and state pat-  
17 tern differences between these methods, we evaluate the chromatin state signatures of both  
18 ChromHMM and MACS2 around TSS of expressed and non-expressed genes (Fig. 4b,c).  
19 In contrast to chromstaR, chromatin signatures obtained by the other two methods did  
20 not as effectively distinguish these two classes of genes, suggesting that chromstaR has  
21 a higher sensitivity for detecting these signatures (**Supplementary Materials**).

## 22 **Application 2: Differential analysis of combinatorial chromatin states**

23 In order to understand combinatorial chromatin state signatures that are specific to a  
24 given cell type or disease state, it is necessary to compare at least two different tissues  
25 with each other, or a case and a control. In this context, the goal is to identify genomic  
26 regions showing differential (or non-differential) combinatorial state patterns. Such dif-

ferential patterns are indicative of regions that underly the tissue differences and are therefore of substantial biological or clinical interest. chromstaR solves this problem by considering all  $2^{2N}$  possible combinatorial/differential chromatin states (Fig. 1c), where  $N$  is the number of histone modifications measured in both conditions. Out of the  $2^{2N}$  states,  $2^N$  are non-differential and  $2^{2N} - 2^N$  are differential.

We analyzed two differentiated mouse hematopoietic cells (monocytes versus CD4 T-cells) from (Lara-Astiaso et al., 2014), with four histone marks each (H3K4me1, H3K4me2, H3K4me3 and H3K27ac). We found that 5.37% of the genome showed differences in combinatorial state patterns between the two cell types (Fig. 7a, example browser shot in Fig. 8). The most frequent differential regions involved the [me1] combination (2.37%) followed by regions with the [me1/2/3+ac] combination (0.92%). These differences are even more striking when viewed in relative numbers: 59% of the [me1/2/3+ac] sites were concordant between the two cell types, while only 8% of the [me1] sites were concordant. This is in line with previous findings showing that H3K4me1 is highly cell type specific (Leung et al., 2015; Andersson et al., 2014; Dixon et al., 2015; Amin et al., 2015).

In order to determine if these differences in chromatin play a role in cellular identity, we explored gene expression differences for differential chromatin states. We found that loss of state [me1] as well as of state [me1/2/3+ac] is correlated with a decrease in expression levels (Fig. 7b). This is consistent with our previous observation (**section Application 1**) that [me1/2/3+ac] defines active promoters and [me1] together with [me1/2/3+ac] defines enhanced active promoters (Fig. 6). To investigate the function of the differential loci, we performed a GO term enrichment of these regions (McLean et al., 2010) and found an impressive confirmation of cell type identity in the GO terms (Table S1): While regions that are marked by [me1/2/3+ac] or [me1] in both cell types

1 show enrichment for general immune cell differentiation terms, regions that are marked  
2 with [me1] or [me1/2/3+ac] only in CD4 T-cells show terms such as “T-cell activation  
3 and differentiation”. Vice versa, regions that are marked with those signatures in mono-  
4 cytes but not in T-cells show enrichment of terms such as “response to other organism”  
5 and “inflammatory response”.

6

7 Again, we compared our results on the same dataset with MACS2 (Zhang et al.,  
8 2008) and ChromHMM (Ernst and Kellis, 2012). Neither method was specifically de-  
9 signed to deal with differences between combinatorial states, but both tools represent  
10 approaches that could have been chosen for that task in the absence of other suitable  
11 methods. For both methods, the percentage of the epigenome that was differentially  
12 modified was found to be 2.5 times higher than predicted by chromstaR, 13.02% for  
13 MACS2 and 13.59% for ChromHMM. MACS2 found most differences (3.90%) in state  
14 [me1], followed by the combination [me2+ac] (2.11%). None of these states yielded any  
15 significant enrichment in GO terms or showed correlation with expression data (Fig. S5c  
16 and Table S2). The third most frequent differential state was [me1+ac] (1.88%) and  
17 this state yielded GO term enrichments which reflect cellular identity. ChromHMM pre-  
18 dicted two “enhancer-like states” E8 and E9 (Fig. S5b) as most differential between cell  
19 types (2.71% and 2.54%) which also showed cell type specific terms in the GO analy-  
20 sis (Table S3). However, expression analysis showed that ChromHMM’s most frequent  
21 differential state (CD4:E12 and Mono:E14) corresponded to proximal genes that were  
22 transcriptionally nearly inactive (Fig. S5b), which raises the question if these differential  
23 chromatin states produce cell-specific functional differences.

24

### Application 3: Tracking combinatorial chromatin state dynamics in time

Arguably the most challenging experimental set up is when several histone modifications have been collected for a large number of conditions, such as different cell types along a differentiation tree or different terminally differentiated tissues (Fig. S1). We consider  $M$  conditions with  $N$  histone modifications measured in each of them. This leads to  $2^N$  possible combinatorial states per condition, or alternatively to  $2^M$  differential states per mark across all samples. Therefore, the number of possible dynamic combinatorial chromatin states is  $2^{M \times N}$ . For  $M \times N \leq C$  the whole dynamic/combinatorial chromatin landscape is treatable computationally, while for  $M \times N > C$  the problem becomes intractable with current computational resources. The value of  $C$  is dependent on computational resources, genome length and bin size (see section **Limitations**).

We considered again the mouse hematopoietic data from (Lara-Astiaso et al., 2014), with four histone modifications (H3K4me1, H3K4me2, H3K4me3 and H3K27ac) measured in 16 different cell types during hematopoietic differentiation (stem cells, progenitor and terminally differentiated cells). We explored the chromatin dynamics during the differentiation process for every hematopoietic branch (Fig. S1a): first, long term hematopoietic stem cells (LT-HSC) are transformed into short term hematopoietic stem cells (ST-HSC) and further into multipotent progenitors (MPP). The MPP cells differentiate into the several common lineage oligopotent progenitors, giving rise to the three different hematopoietic branches (myeloid, leukocyte and erythrocyte). Finally, after another one or two stages, cells become fully differentiated at the bottom of the tree. Every branch from root to leaf consists therefore of four histone marks in five or six time points, with  $2^{M \times N} = 1048576$  or  $16777216$  possible dynamic combinatorial chromatin states, respectively. Because this number is computationally intractable, we implemented the following two-step approach for each branch: (1) for each of the four histone marks separately, we performed a multivariate differential analysis along the five

1 or six cells in the branch, therefore assigning every bin in the genome to one of the 32 or  
2 64 possible differential combinatorial states; (2) We reconstructed the full combinatorial  
3 chromatin state dynamics by combining the differential calls of all four marks in step 1,  
4 bin by bin (Fig. S6a).

5  
6 Using this two-step approach, we studied the dynamics of the inferred chromatin states  
7 over developmental time. We observed an initial increase in the frequency of the [me1]  
8 state from the LT-HSC to intermediate progenitor stages, followed by a decrease to the  
9 fully differentiated stages (Fig. S7). This decrease in [me1] was especially pronounced  
10 in the lymphoid and erythroid lineage. In the [me1/2/3+ac] signature we found a small  
11 but continuous decrease from LT-HSC to terminally differentiated stages. These observa-  
12 tions are consistent with the view that chromatin transitions from an open configuration  
13 in multipotent cells to a closed configuration in differentiated cells. Figure S8 shows  
14 two examples of pluripotency genes that lose their open chromatin configuration in the  
15 differentiated stage.

16  
17 We next explored the specific dynamic chromatin state transitions that occur in every  
18 region of the genome during the differentiation process. We found that the majority of  
19 all possible dynamic chromatin state transitions were not present in this system. For  
20 example, in the CD4 T-cell branch of the hematopoietic tree there are 5 developmen-  
21 tal time points and at each stage 16 combinatorial states can be theoretically present.  
22 This leads to  $16^5 = 1048576$  potential transitions between combinatorial states in this  
23 branch. However, we found only 1086 different chromatin transitions and the first most  
24 frequent 99 transitions (with frequency  $\geq 0.01\%$ ) already involved 99.60% of the genome.  
25 To summarize these transitions further, we grouped them into 4 different classes: (1)  
26 “Empty” transitions, i.e. those regions that have no histone modification in any of  
27 the developmental stages. (2) “Constant” transitions, i.e. those regions that show the

1 same (non-empty) combinatorial state in all stages of differentiation. (3) “Stage-specific”  
2 transitions, i.e. those regions that show a combinatorial state only in a subset of differ-  
3 entiation stages and are in the “empty” state otherwise. (4) All other transitions (see  
4 Fig. 9 for examples). In the CD4 T-cell branch, 85.98% of the genome has no mea-  
5 sured chromatin signature in all 5 stages (class 1). The constant transitions (class 2)  
6 comprise 5.87% of the genome, stage-specific transitions 5.69% (class 3) and all other  
7 transitions 2.46% (class 4), respectively. Altogether, only 8.15% of the genome changes  
8 its chromatin state during differentiation and more than half of these changes are due  
9 to changes in the [me1] signature. This signature is highly cell type specific and gains  
10 and losses correspond to stage-specific terms in a GO analysis (Table S4) and to changes  
11 in gene expression (Fig. S9a). Among the constant transitions, regions with signature  
12 [me1/2/3+ac] mark constitutively expressed genes (Fig. S9a). Therefore we expect those  
13 regions to be enriched with housekeeping functions, which is confirmed by the GO anal-  
14 ysis (Table S5).

15  
16 We compared our results on the CD4 T-cell branch with MACS2 (Zhang et al., 2008)  
17 and ChromHMM (Ernst and Kellis, 2012). Strikingly, MACS2 found 34470 different  
18 chromatin state transitions with the most frequent 330 (with frequency  $\geq 0.01\%$ ) cov-  
19 ering only 94.47% of the genome. This large number is expected since MACS2 is a uni-  
20 variate peak caller and not designed for differential analysis. Furthermore, this dataset  
21 represents a differential analysis not between 2 cell types, but between 5 different cell  
22 types and thus boundary effects (false positives, e.g. falsely detected differences) are  
23 extremely likely. This interpretation is supported by the expression data, which could  
24 not find clear expression differences for the most frequent differentially modified re-  
25 gions (Fig. S9c). Also the GO analysis could not identify any significant GO terms.  
26 ChromHMM found 38288 different state transitions of which the first 656 cover only  
27 91.21% of the genome. This large number of transitions is dependent on the number of

1 states that are used to train ChromHMM, since extra states will artificially inflate the  
2 number of chromatin state transitions. However, consistent with the chromstaR pre-  
3 dictions, ChromHMM predicts many stage-specific enhancer (state E15 and E16) and  
4 constant promoter (state E9) regions among the most frequent transitions. The expres-  
5 sion profiles associated with those transitions show the expected behaviour (Fig. S9b).

## 6 **Limitations and Solutions**

7 The number of possible combinatorial states for  $N$  ChIP-seq experiments is  $2^N$ , meaning  
8 that for each additional ChIP-seq experiment the number of combinatorial states dou-  
9 bles. Thus it soon becomes computationally prohibitive to consider all combinatorial  
10 states. We found that with current computational resources (Intel Xeon E5 2680v3, 24  
11 cores @ 2.5 GHz, 128GB memory) a practical limit seems to be 256 states (= 8 ex-  
12 periments) with a run-time of several days for a mouse genome ( $\approx 2.6 \cdot 10^9$ bp) and a  
13 bin size of 1000bp ( $\approx 2.6$ M datapoints). We investigated several possibilities to extend  
14 the usability of chromstaR beyond this limit: (1) The run-time of our algorithm scales  
15 linearly with the number of data points, and thus the easiest strategy is to decrease  
16 the resolution, e.g. halving the run-time by doubling the bin size. (2) Calculations can  
17 be performed for each chromosome separately, allowing for easy parallelization of the  
18 task. (3) For the case of one cell type or tissue where the number of measured histone  
19 modifications  $N$  exceeds the upper limit, chromstaR provides a strategy to artificially  
20 restrict the number of combinatorial states to any number lower than  $2^N$ . This strategy  
21 can yield proper results if the correct states are included, since our results have shown  
22 that the majority of combinatorial states are absent in the genome. In order to identify  
23 the states which are the most present in the genome, chromstaR ranks the combinatorial  
24 states based on their presence according to the combination of univariate results from  
25 the first step of the chromstaR pipeline. This ranking is a good approximation of the  
26 true multivariate state-distribution (Fig. S10). (4) If there are multiple marks  $N$  in



multiple tissues  $M$ , and  $2^{N*M}$  is bigger than the maximum number of states that the algorithm can handle computationally, two strategies are possible: One can either perform a differential analysis for each mark and then reconstruct combinatorial states in a classical way (Fig. S6a) or one can perform a multivariate peak-calling of combinatorial states for each tissue and then obtain the differences by a simple comparison between tissues (Fig. S6b). Both strategies give a different perspective on the data: The former accurately identifies differences between marks, while the combinatorial states might be subject to boundary effects (similar to a univariate peak-calling method). The latter gives an accurate picture of the combinatorial chromatin landscape, while differences between cells might be overestimated.

## Discussion

Understanding how various histone modifications interact to determine cis-regulatory gene expression states is a fundamental problem in chromatin biology. It is becoming increasingly clear that certain combinatorial patterns of these modifications define discrete chromatin states along the genome. These chromatin states “encode” cell-specific transcriptional programs, and constitute functional units that are subject to dynamic changes in response to developmental and environmental cues.

Many experimental studies have recognized this and collected ChIP-seq data for a number of histone modifications on the same or different tissue(s) as well as for several developmental time points. Integrative analyses of such datasets often present formidable bioinformatic challenges. Only a few computational methods exist that can analyze multiple ChIP-seq experiments together and cluster them into a finite number of chromatin states (Biesinger et al., 2013; Ernst and Kellis, 2012; Hoffman et al., 2012; Sohn et al., 2015; Zeng et al., 2013). Interestingly, these methods often demand that the user speci-

1   fies the number of chromatin states beforehand. We find this problematic because this  
2   number is often a desired output of the analysis rather than an input. Indeed, the true  
3   number of distinct chromatin states in the genomes of various species is subject to debate.  
4   In *D. melanogaster* 9 chromatin states have been reported (Kharchenko et al., 2011),  
5   while in *A. thaliana* 4 main states were found (Roudier et al., 2011). In human, Ernst  
6   et al. found 51 states in human T-cells (Ernst and Kellis, 2010). The Roadmap Consor-  
7   tium reported 15 to 18 states (Consortium et al., 2015). It remains unclear whether these  
8   differences reflect species divergence at the level of chromatin organization, or whether  
9   they are due to differences in the assessed chromatin marks and bioinformatic treatment  
10   of the data. Without a formal computational framework for defining chromatin states  
11   these two possibilities cannot be confidently distinguished.

12  
13   While multivariate methods such as ChromHMM or Segway provide possible compu-  
14   tational solutions to such questions, these methods employ probabilistic chromatin state  
15   definitions that are not always readily interpretatble. A probalistic interpretation means  
16   that different combinatorial histone modification patterns can be simultaneously part of  
17   different underlying chromatin states. However, it is not immediately obvious whether  
18   the underlying chromatin state are biologically distinct or if they are only statistical  
19   entities that are otherwise biologically redundant. Identifying such redundancies is not  
20   easy, because of a lack of rules to decide whether two or more chromatin states can or  
21   cannot be considered to be equivalent. Such decisions require extensive manual curation  
22   of the output, and often presuppose the kind of biological knowledge that one wishes to  
23   obtain from the data in the first place.

24  
25   In contrast to this probabilistic state definition, chromstaR outputs discrete chromatin  
26   states that are defined on the basis of the presence/absence of various histone modifica-  
27   tions. That is, with  $N$  histone modifications, it infers all  $2^N$  combinatorial chromatin

1 states (Fig. 1a). This interpretation makes it easy to relate the inferred chromatin states  
2 back to the underlying histone modification patterns and thus fashions a direct mech-  
3 anistic link between chromatin structure and function. Moreover, chromstaR’s discrete  
4 state definition also provides an “unbiased” picture of the genome-wide frequency of vari-  
5 ous chromatin states and allows for easy genome-wide summary statistics. For instance,  
6 in our analysis of four histone modifications in mouse embryonic stem cells we found that  
7 only 7 of the 16 possible states covered almost 100% of the genome, and for the human  
8 hippocampus with seven modifications only 21 of the 128 possible combinatorial states  
9 already covered 99% of the total genome. This striking sparsity in the combinatorial  
10 code is interesting and points at certain biochemical constraints that determine which  
11 histone modifications can or cannot co-occur at a genomic locus. Clearly, the genome-  
12 wide frequency of inferred combinatorial chromatin states depends on the number and  
13 the type of different histone modifications that are used in the analysis. Future stud-  
14 ies should systematically investigate the dependency of the number of chromatin states  
15 on factors such as number and type of measured histone marks, resolution, organism etc.

16  
17 By treating discrete combinatorial chromatin states as units of analysis chromstaR  
18 can also easily track chromatin state dynamics across cell types or developmental time  
19 points. In that respect chromstaR is unique as no other methods exist to date that  
20 can perform a similar task. To illustrate this we have analyzed four different histone  
21 modification in 5 different cell types that are part of the mouse T-cell differentiation  
22 pathway. Of the 1048576 combinatorial state transitions, we find that only 99 comprise  
23 over 99.60% of the genome. Again, the sparsity in state transition shows that a few key  
24 transitions define the developmental trajectory of T-cell differentiation. One notable  
25 transition is the gain or loss of state [me1] near promoters. We note that this state  
26 means that only H3K4me1 is present at a locus and no other marks. This is not the  
27 same as tracking H3K4me1 modification by itself as this latter mark can appear in a

1 number of different, and often functionally distinct, chromatin states such as [me1+ac],  
 2 [me1/2+ac], [me1/2/3]. Hence, focusing on H3K4me1 alone would tag other chromatin  
 3 state changes that may not be fully informative about T-cell differentiation.

## 5 **Conclusions**

6 chromstaR is a computational algorithm that can identify discrete chromatin states from  
 7 multiple ChIP-seq experiments and detect combinatorial state differences between cell-  
 8 types and/or developmental time points. By defining chromatin states in terms of the  
 9 presence and absence of combinatorial histone modification patterns, it provides an  
 10 intuitive way to understand genome regulation in terms of chromatin composition at  
 11 a locus. chromstaR can be used for the annotation of reference epigenomes as well as  
 12 for annotation of chromatin state transitions in well-described developmental systems.  
 13 The algorithm is written in C++ and runs in the popular R computing environment.  
 14 It therefore combines computational speed with the extensive bioinformatic toolsets  
 15 available through Bioconductor (Gentleman et al., 2004; Huber et al., 2015). chromstaR  
 16 is freely available at <https://github.com/ataudt/chromstaR>.

## 17 **Acknowledgements**

18 Text for this section ...

## 19 **Competing interests**

20 The authors declare that they have no competing interests.

## **1 Author's contributions**

2 MCT and FJ designed the research. AT, MCT, MAN and MH developed the algorithm.

1 AT analyzed the data. AT, MCT and FJ wrote the manuscript.

## <sup>1</sup> **Figures**

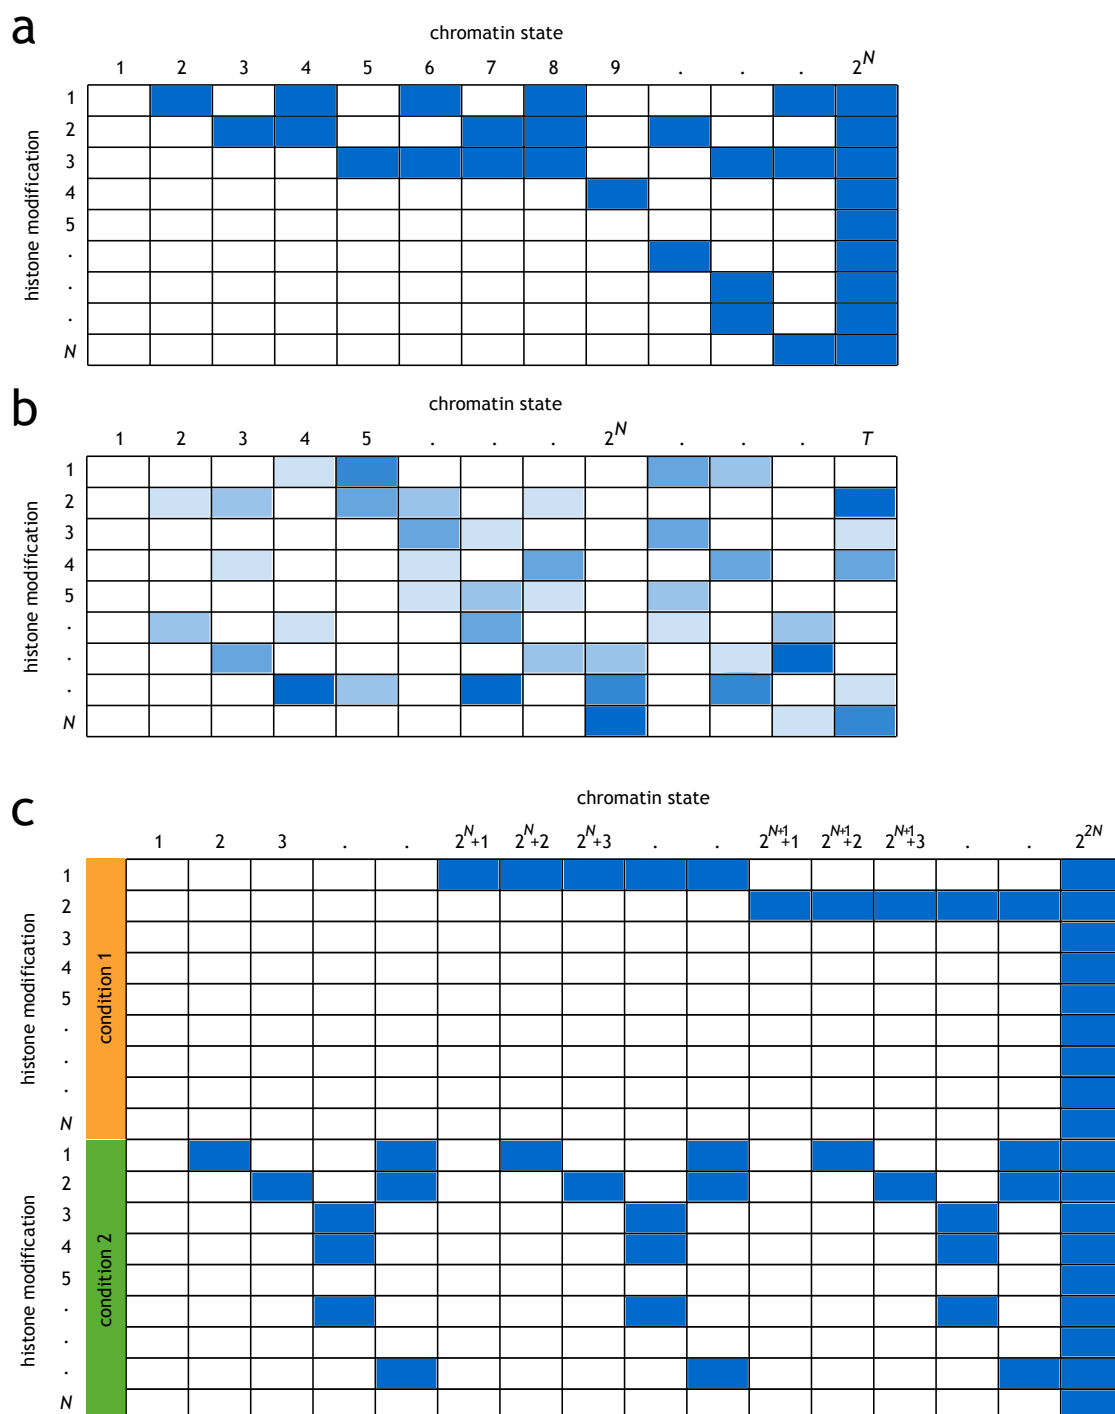

**Figure 1: Definition of chromatin states.** (a) Combinatorial chromatin state definition: Based on the presence (blue) or absence (white) of a histone modification, a chromatin state is the combination of the presence/absence calls at a given position. With  $N$  histone modifications there are  $2^N$  different chromatin states. (b) Probabilistic chromatin state definition: Each chromatin state has a probability (shades of blue) of finding a histone modification at a given position. Note that a probabilistic state can consist of multiple combinatorial states and vice versa. There is in principle no upper limit for the number of possible probabilistic chromatin states (here,  $T$ ). (c) Differential combinatorial chromatin states across two conditions: Based on the presence (blue) or absence (white) of a histone modification across different conditions. With  $N$  histone modifications and  $M$  conditions there are  $2^{N \times M}$  different states.

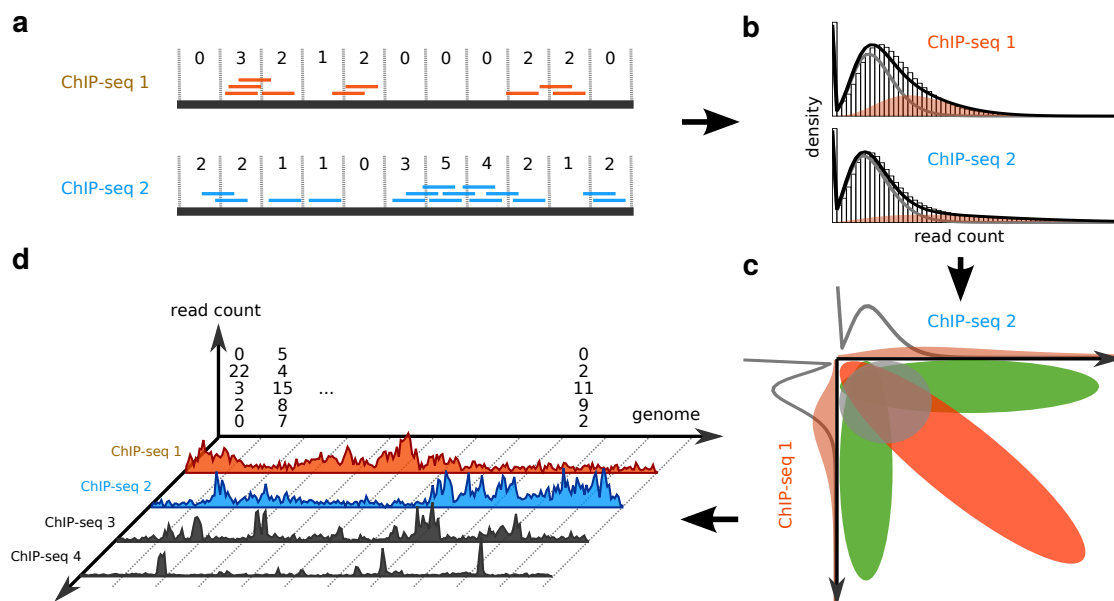

**Figure 2: Overview of analytical approach.** (a) Aligned reads are counted in equidistant, non-overlapping bins. (b) The resulting read count is used to fit a univariate Hidden Markov Model to each ChIP-seq experiment separately. (c) From the univariate emission densities, a multivariate emission density is constructed (shown here for two dimensions). (d) A multivariate Hidden Markov Model is employed to obtain peak-calls for all ChIP-seq experiments combined.



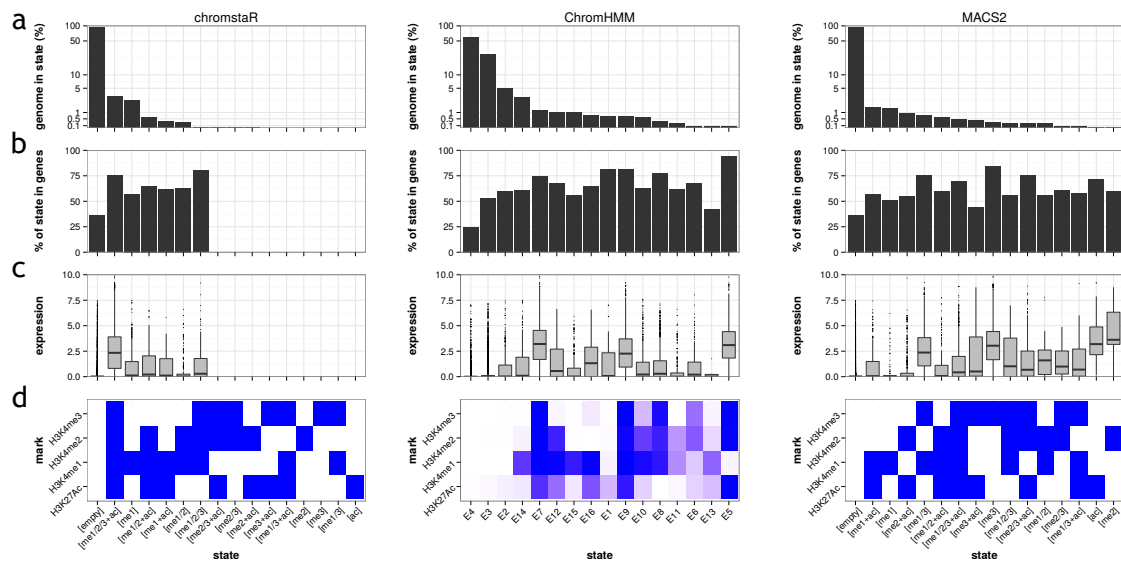

Figure 3: **Chromatin states in monocytes.** (a) Genomic frequency, i.e. the percentage of the genome that is covered by the chromatin state. The sum over all states equals 100%. (b) Overlap with known genes. (c) Expression levels of genes whose TSS overlaps the chromatin state. (d) Heatmap showing the chromatin state definition. Histones in chromstaR and MACS2 states are either present (blue) or absent (white). ChromHMM states have a continuous emission probability from zero (white) to one (blue).

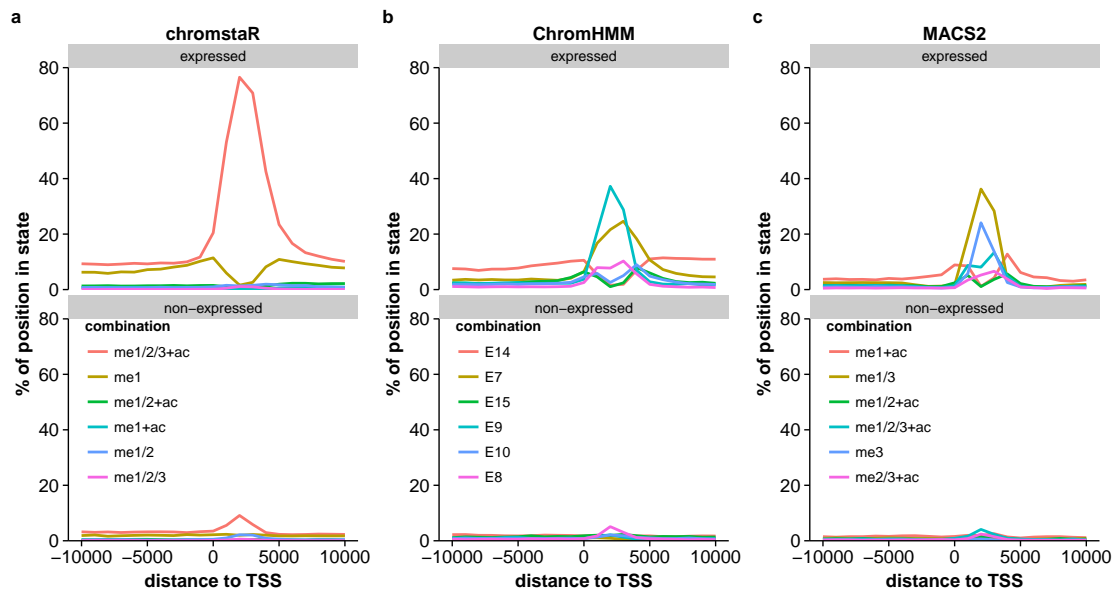

Figure 4: Enrichment of chromatin states around TSS of expressed and non-expressed genes. Shown are the enrichment profiles for the 6 states that are most enriched around TSS.

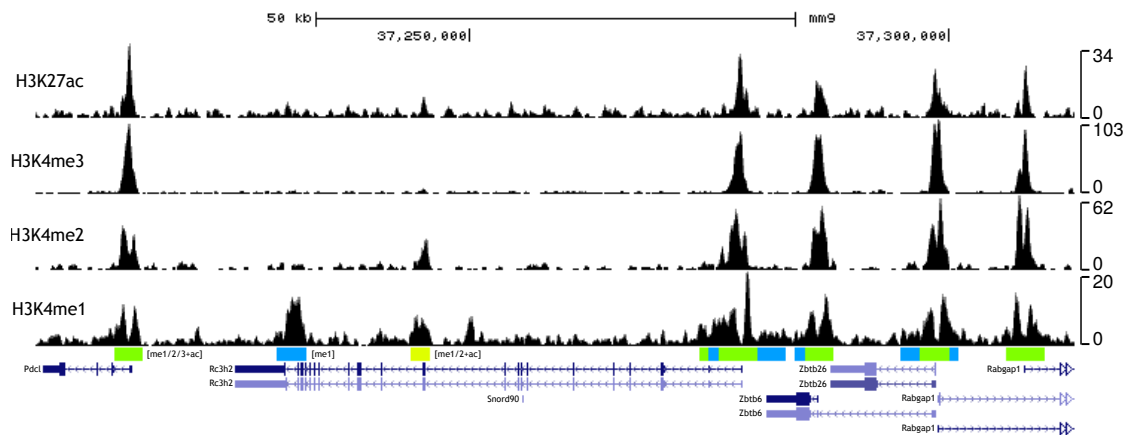

Figure 5: **Genome browser snapshot** showing an example of several active promoter signatures [me1/2/3+ac] flanked by the [me1] signature.

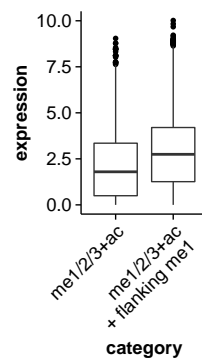

Figure 6: Expression levels of genes whose TSS shows either the [me1/2/3+ac] signature alone or the [me1/2/3+ac] signature flanked by [me1]. TSS flanked by [me1] show significantly higher expression levels ( $p \approx 10^{-101}$ , t-test).

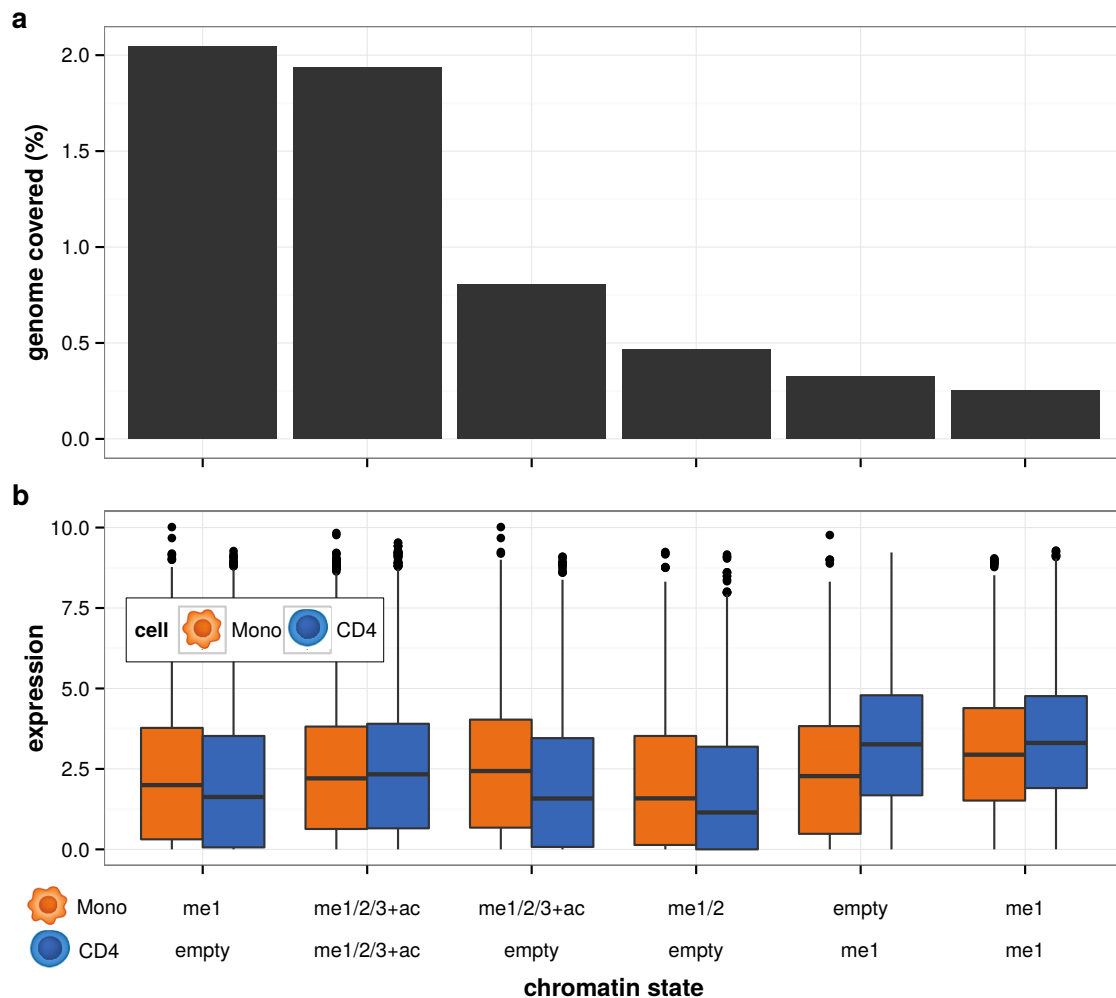

Figure 7: **Differential analysis of monocytes and CD4 T-cells.** (a) Genomic frequency of the 6 most frequent chromatin states. (b) Expression of genes which overlap the given chromatin state.

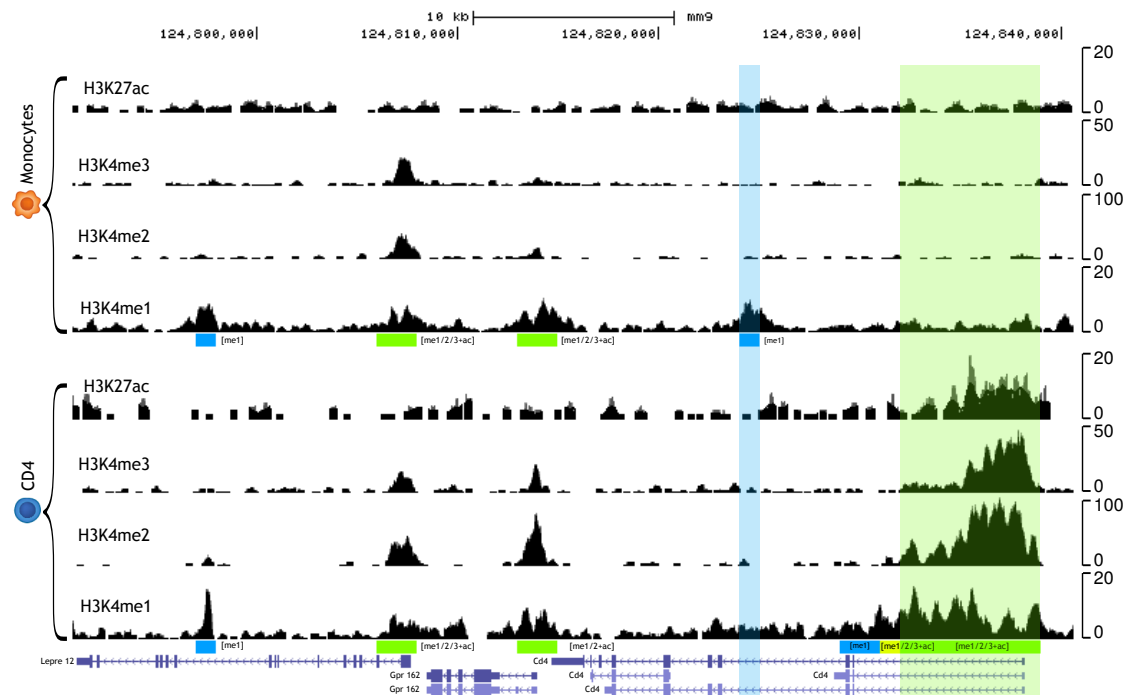

Figure 8: **Differential chromatin signature at the *Cd4* locus.** Example of a differential promoter and enhancer signature at the *Cd4* gene. The differential promoter signature [me1/2/3+ac] is only present in CD4 T-cells (shaded green), while the differential enhancer [me1] is present only in monocytes (shaded blue).

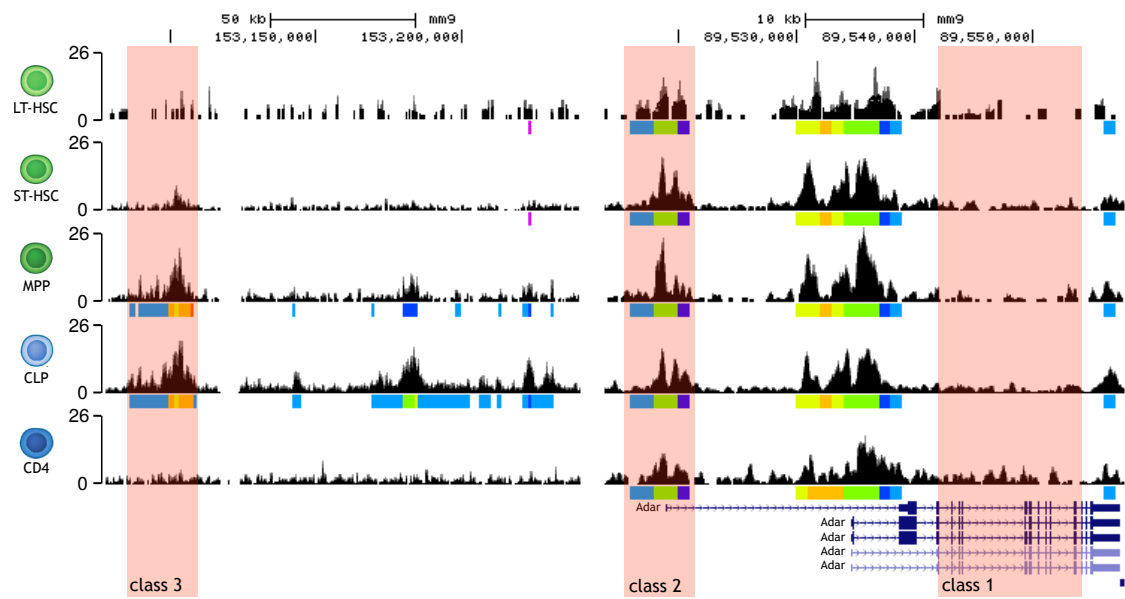

Figure 9: Examples of different classes of transitions (shaded in red): “Empty” (class 1), “constant” (class 2) and “stage-specific” transitions (class 3). Only the H3K4me1 tracks are shown. Combinatorial chromatin states as obtained by chromstaR are shown below the H3K4me1 tracks as colored bars.

# 1 Tables

|    | [me1/2/3+ac] + flanking [me1]                         | [me1/2/3+ac]                          |
|----|-------------------------------------------------------|---------------------------------------|
| 1  | nucleobase-containing compound transport              | ncRNA metabolic process               |
| 2  | RNA localization                                      | ncRNA processing                      |
| 3  | negative regulation of mRNA splicing, via spliceosome | tRNA metabolic process                |
| 4  | RNA transport                                         | protein folding                       |
| 5  | negative regulation of mRNA processing                | DNA replication                       |
| 6  | mRNA transport                                        | rRNA metabolic process                |
| 7  | peptidyl-lysine modification                          | tRNA processing                       |
| 8  | response to misfolded protein                         | rRNA processing                       |
| 9  | purinergic nucleotide receptor signaling pathway      | protein peptidyl-prolyl isomerization |
| 10 | regulation of gene expression, epigenetic             | pseudouridine synthesis               |

Table 1: The first 10 significant gene ontology terms for TSS overlapping the [me1/2/3+ac] state with the [me1] state flanking it, versus the TSS overlapping the [me1/2/3+ac] state.

## 2 References

- 3 Amin, V., Harris, R. A., Onuchic, V., Jackson, A. R., Charnecki, T., Paithankar, S.,  
4 Lakshmi Subramanian, S., Riehle, K., Coarfa, C., and Milosavljevic, A., *et al.*, 2015.  
5 Epigenomic footprints across 111 reference epigenomes reveal tissue-specific epigenetic  
6 regulation of lincRNAs. *Nature Communications*, **6**(May 2014):6370.
- 7 Andersson, R., Gebhard, C., Miguel-Escalada, I., Hoof, I., Bornholdt, J., Boyd, M.,  
8 Chen, Y., Zhao, X., Schmidl, C., Suzuki, T., *et al.*, 2014. An atlas of active enhancers  
9 across human cell types and tissues. *Nature*, **507**(7493):455–61.
- 10 Barski, A., Cuddapah, S., Cui, K., Roh, T.-Y., Schones, D. E., Wang, Z., Wei, G.,  
11 Chepelev, I., and Zhao, K., 2007. High-resolution profiling of histone methylations in  
12 the human genome. *Cell*, **129**(4):823–37.
- 13 Baum, L. E., Petrie, T., Soules, G., and Weiss, N., 1970. A Maximization Technique  
14 Occurring in the Statistical Analysis of Probabilistic Functions of Markov Chains. *The*  
15 *Annals of Mathematical Statistics*, **41**(1):164–171.
- 16 Bernstein, B. E., Birney, E., Dunham, I., Green, E. D., Gunter, C., and Snyder, M.,  
17 2012. An integrated encyclopedia of DNA elements in the human genome. *Nature*,  
18 **489**(7414):57–74.
- 19 Bernstein, B. E., Kamal, M., Lindblad-Toh, K., Bekiranov, S., Bailey, D. K., Huebert,  
20 D. J., McMahon, S., Karlsson, E. K., Kulbokas, E. J., Gingeras, T. R., *et al.*, 2005.  
21 Genomic maps and comparative analysis of histone modifications in human and mouse.  
22 *Cell*, **120**(2):169–81.
- 23 Bernstein, B. E., Stamatoyannopoulos, J. A., Costello, J. F., Ren, B., Milosavljevic,  
1 A., Meissner, A., Kellis, M., Marra, M. A., Beaudet, A. L., Ecker, J. R., *et al.*,



2     2010. The NIH Roadmap Epigenomics Mapping Consortium. *Nature biotechnology*,  
3     **28**(10):1045–8.

4     Biesinger, J., Wang, Y., and Xie, X., 2013. Discovering and mapping chromatin states  
5     using a tree hidden Markov model. *BMC bioinformatics*, **14 Suppl 5**:S4.

6     Consortium, R. E., Kundaje, A., Meuleman, W., Ernst, J., Bilenky, M., Yen, A., Heravi-  
7     Moussavi, A., Kheradpour, P., Zhang, Z., Wang, J., *et al.*, 2015. Integrative analysis  
8     of 111 reference human epigenomes. *Nature*, **518**:317–330.

9     Dixon, J. R., Jung, I., Selvaraj, S., Shen, Y., Antosiewicz-Bourget, J. E., Lee, A. Y., Ye,  
10     Z., Kim, A., Rajagopal, N., Xie, W., *et al.*, 2015. Chromatin architecture reorganiza-  
11     tion during stem cell differentiation. *Nature*, **518**(7539):331–336.

12     Durinck, S., Moreau, Y., Kasprzyk, A., Davis, S., De Moor, B., Brazma, A., and Huber,  
13     W., 2005. BioMart and Bioconductor: a powerful link between biological databases  
14     and microarray data analysis. *Bioinformatics (Oxford, England)*, **21**(16):3439–40.

15     Durinck, S., Spellman, P. T., Birney, E., and Huber, W., 2009. Mapping identifiers  
16     for the integration of genomic datasets with the R/Bioconductor package biomaRt.  
17     *Nature protocols*, **4**(8):1184–91.

18     Ernst, J. and Kellis, M., 2010. Discovery and characterization of chromatin states for  
19     systematic annotation of the human genome. *Nature biotechnology*, **28**(8):817–25.

20     Ernst, J. and Kellis, M., 2012. ChromHMM: automating chromatin-state discovery and  
21     characterization. *Nature methods*, **9**(3):215–216.

22     Gentleman, R. C., Carey, V. J., Bates, D. M., Bolstad, B., Dettling, M., Dudoit, S.,  
23     Ellis, B., Gautier, L., Ge, Y., Gentry, J., *et al.*, 2004. Bioconductor: open software de-  
1     velopment for computational biology and bioinformatics. *Genome biology*, **5**(10):R80.

- 2 Heinig, M., Colomé-Tatché, M., Taudt, A., Rintisch, C., Schafer, S., Pravenec, M., Hub-  
3 ner, N., Vingron, M., and Johannes, F., 2015. histoneHMM: Differential analysis of  
4 histone modifications with broad genomic footprints. *BMC Bioinformatics*, **16**(1):60.
- 5 Heintzman, N. D., Hon, G. C., Hawkins, R. D., Kheradpour, P., Stark, A., Harp, L. F.,  
6 Ye, Z., Lee, L. K., Stuart, R. K., Ching, C. W., *et al.*, 2009. Histone modifica-  
7 tions at human enhancers reflect global cell-type-specific gene expression. *Nature*,  
8 **459**(7243):108–12.
- 9 Hoffman, M. M., Buske, O. J., Wang, J., Weng, Z., Bilmes, J. A., and Noble, W. S.,  
10 2012. Unsupervised pattern discovery in human chromatin structure through genomic  
11 segmentation. *Nature methods*, **9**(5):473–6.
- 12 Hoffman, M. M., Ernst, J., Wilder, S. P., Kundaje, A., Harris, R. S., Libbrecht, M.,  
13 Giardine, B., Ellenbogen, P. M., Bilmes, J. a., Birney, E., *et al.*, 2013. Integra-  
14 tive annotation of chromatin elements from ENCODE data. *Nucleic acids research*,  
15 **41**(2):827–41.
- 16 Huber, W., Carey, V. J., Gentleman, R., Anders, S., Carlson, M., Carvalho, B. S., Bravo,  
17 H. C., Davis, S., Gatto, L., Girke, T., *et al.*, 2015. Orchestrating high-throughput  
18 genomic analysis with Bioconductor. *Nature Methods*, **12**(2):115–121.
- 19 Huda, A., Mariño-Ramírez, L., and Jordan, I. K., 2010. Epigenetic histone modifications  
20 of human transposable elements: genome defense versus exaptation. *Mobile DNA*,  
21 **1**(1):2.
- 22 Jenuwein, T. and Allis, C. D., 2001. Translating the histone code. *Science (New York,*  
23 *N.Y.)*, **293**(5532):1074–80.
- 24 Kharchenko, P. V., Alekseyenko, A. A., Schwartz, Y. B., Minoda, A., Riddle, N. C.,  
1 Ernst, J., Sabo, P. J., Larschan, E., Gorchakov, A. A., Gu, T., *et al.*, 2011. Com-

- 2     prehensive analysis of the chromatin landscape in *Drosophila melanogaster*. *Nature*,  
3     **471**(7339):480–5.
- 4     Koch, C. M., Andrews, R. M., Flicek, P., Dillon, S. C., Karaöz, U., Clelland, G. K.,  
5     Wilcox, S., Beare, D. M., Fowler, J. C., Couttet, P., *et al.*, 2007. The landscape of  
6     histone modifications across 1% of the human genome in five human cell lines. *Genome*  
7     *research*, **17**(6):691–707.
- 8     Langmead, B. and Salzberg, S. L., 2012. Fast gapped-read alignment with Bowtie 2.  
9     *Nature methods*, **9**(4):357–9.
- 10    Lara-Astiaso, D., Weiner, A., Lorenzo-Vivas, E., Zaretzky, I., Jaitin, D. A., David, E.,  
11    Keren-Shaul, H., Mildner, A., Winter, D., Jung, S., *et al.*, 2014. Chromatin state  
12    dynamics during blood formation. *Science (New York, N.Y.)*, **55**(233348):1–10.
- 13    Lawrence, M., Huber, W., Pagès, H., Aboyoun, P., Carlson, M., Gentleman, R., Morgan,  
14    M. T., and Carey, V. J., 2013. Software for computing and annotating genomic ranges.  
15    *PLoS computational biology*, **9**(8):e1003118.
- 16    Leung, D., Jung, I., Rajagopal, N., Schmitt, A., Selvaraj, S., Lee, A. Y., and Yen, C.-  
17    a., 2015. Integrative analysis of haplotype-resolved epigenomes across human tissues.  
18    *Nature*, **518**:350–354.
- 19    Luo, C., Sidote, D. J., Zhang, Y., Kerstetter, R. A., Michael, T. P., and Lam, E., 2013.  
20    Integrative analysis of chromatin states in *Arabidopsis* identified potential regulatory  
21    mechanisms for natural antisense transcript production. *The Plant journal : for cell*  
22    *and molecular biology*, **73**(1):77–90.
- 23    McLean, C. Y., Bristor, D., Hiller, M., Clarke, S. L., Schaar, B. T., Lowe, C. B.,  
24    Wenger, A. M., and Bejerano, G., 2010. GREAT improves functional interpretation  
1    of cis-regulatory regions. *Nature biotechnology*, **28**(5):495–501.

- 2 Mikkelsen, T. S., Ku, M., Jaffe, D. B., Issac, B., Lieberman, E., Giannoukos, G., Alvarez,  
3 P., Brockman, W., Kim, T.-K., Koche, R. P., *et al.*, 2007. Genome-wide maps of  
4 chromatin state in pluripotent and lineage-committed cells. *Nature*, **448**(7153):553–  
5 60.
- 6 Pokholok, D. K., Harbison, C. T., Levine, S., Cole, M., Hannett, N. M., Lee, T. I., Bell,  
7 G. W., Walker, K., Rolfe, P. A., Herbolsheimer, E., *et al.*, 2005. Genome-wide map  
8 of nucleosome acetylation and methylation in yeast. *Cell*, **122**(4):517–27.
- 9 Rashid, N. U., Giresi, P. G., Ibrahim, J. G., Sun, W., and Lieb, J. D., 2011. ZINBA  
10 integrates local covariates with DNA-seq data to identify broad and narrow regions of  
11 enrichment, even within amplified genomic regions. *Genome biology*, **12**(7):R67.
- 12 Renard, B. and Lang, M., 2007. Use of a Gaussian copula for multivariate extreme value  
13 analysis: Some case studies in hydrology. *Advances in Water Resources*, **30**(4):897–  
14 912.
- 15 Rintisch, C., Heinig, M., Bauerfeind, A., Schafer, S., Mieth, C., Patone, G., Hummel, O.,  
16 Chen, W., Cook, S., Cuppen, E., *et al.*, 2014. Natural variation of histone modification  
17 and its impact on gene expression in the rat genome. *Genome research*, **24**(6):942–53.
- 18 Robertson, G., Hirst, M., Bainbridge, M., Bilenky, M., Zhao, Y., Zeng, T., Euskirchen,  
19 G., Bernier, B., Varhol, R., Delaney, A., *et al.*, 2007. Genome-wide profiles of STAT1  
20 DNA association using chromatin immunoprecipitation and massively parallel se-  
21 quencing. *Nature methods*, **4**(8):651–7.
- 22 Roudier, F., Ahmed, I., Bérard, C., Sarazin, A., Mary-Huard, T., Cortijo, S., Bouyer,  
23 D., Caillieux, E., Duvernois-Berthet, E., Al-Shikhley, L., *et al.*, 2011. Integrative  
24 epigenomic mapping defines four main chromatin states in Arabidopsis. *The EMBO*  
25 *Journal*, **30**(10):1928–1938.
- 1 Sklar, M., 1959. Fonctions de répartition à n dimensions et leurs marges. .

- 2 Sohn, K.-A., Ho, J. W. K., Djordjevic, D., Jeong, H.-H., Park, P. J., and Kim, J. H.,  
3 2015. hiHMM: Bayesian non-parametric joint inference of chromatin state maps.  
4 *Bioinformatics (Oxford, England)*, :btv117–.
- 5 Spyrou, C., Stark, R., Lynch, A. G., and Tavaré, S., 2009. BayesPeak: Bayesian analysis  
6 of ChIP-seq data. *BMC bioinformatics*, **10**:299.
- 7 van der Graaf, A., Wardenaar, R., Neumann, D. A., Taudt, A., Shaw, R. G., Jansen,  
8 R. C., Schmitz, R. J., Colomé-Tatché, M., and Johannes, F., 2015. Rate, spectrum,  
9 and evolutionary dynamics of spontaneous epimutations. *Proceedings of the National*  
10 *Academy of Sciences of the United States of America*, **112**(21):6676–81.
- 11 Wang, Z., Zang, C., Rosenfeld, J. A., Schones, D. E., Barski, A., Cuddapah, S., Cui, K.,  
12 Roh, T.-Y., Peng, W., Zhang, M. Q., *et al.*, 2008. Combinatorial patterns of histone  
13 acetylations and methylations in the human genome. *Nature genetics*, **40**(7):897–903.
- 14 Yen, A. and Kellis, M., 2015. Systematic chromatin state comparison of epigenomes asso-  
15 ciated with diverse properties including sex and tissue type. *Nature Communications*,  
16 **6**:7973.
- 17 Zeng, X., Sanalkumar, R., Bresnick, E. H., Li, H., Chang, Q., and Keleş, S., 2013.  
18 jMOSAiCS: joint analysis of multiple ChIP-seq datasets. *Genome biology*, **14**(4):R38.
- 19 Zhang, Y., Liu, T., Meyer, C. A., Eeckhoute, J., Johnson, D. S., Bernstein, B. E.,  
20 Nusbaum, C., Myers, R. M., Brown, M., Li, W., *et al.*, 2008. Model-based analysis of  
1 ChIP-Seq (MACS). *Genome biology*, **9**(9):R137.

## 2 Supplementary Materials

### 3 Model Specification

4 The construction of the multivariate Hidden Markov Model can be divided in two steps. In the first step, we fit  
5 a univariate Hidden Markov Model to each individual ChIP-seq sample. The obtained parameters of the mixture  
6 distributions are then used in the second step to construct the multivariate emission distributions. Finally, the  
7 multivariate Hidden Markov Model is fitted to the (combined) ChIP-seq samples. The following sections describe  
8 the two steps in detail.

#### 9 Univariate Hidden Markov Model

10 For each individual ChIP-seq sample, we partition the genome into  $T$  non-overlapping, equally sized bins. We  
11 count the number of aligned reads (regardless of strand) that overlap any given bin  $t$  and denote this read count  
12 with  $x_t$ . Following others (Rashid et al., 2011; Spyrou et al., 2009), we model the distribution of the read counts  $x$   
13 with a two-component mixture of (zero-inflated) negative binomial distributions. In our case, the first component  
14 describes the *unmodified* regions and is modeled by a zero-inflated negative binomial distribution. The second  
15 component describes the *modified* regions and is modeled by a negative binomial distribution. Furthermore, for  
16 computational efficiency, we split the first component into the zero-inflation and the negative binomial distribution  
17 (van der Graaf et al., 2015). Our univariate Hidden Markov Model has thus three states  $i$ : *zero-inflation*,  
18 *unmodified* and *modified*. We write the probability of observing a given read count as

$$P(x_t|\theta) = \gamma_1 f_1(x_t|\theta_1) + \gamma_2 f_2(x_t|\theta_2) + \gamma_3 f_3(x_t|\theta_3) \quad (1)$$

19 where  $\gamma_i$  are the mixing weights and  $\theta_i$  are the component density parameters. The emission distribution of state  
20 1 is defined as

$$f_1(x_t) = \begin{cases} 1 & \text{if } x_t = 0 \\ 0 & \text{if } x_t > 0 \end{cases} \quad (2)$$

21 and the emission distributions of state 2 and 3 are defined as

$$f(x_t|\theta = (n, p)) = \frac{\Gamma(n + x_t)}{\Gamma(n)\Gamma(x_t!)} p^n (1 - p)^{x_t} \quad (3)$$

22 where  $\Gamma$  denotes the Gamma function and  $p$  and  $n$  denote the probability and dispersion parameter of the negative  
23 binomial distribution, respectively.

24 We use the Baum-Welch algorithm (Baum et al., 1970) to obtain a best fit for the distribution parameter  
25 estimates, transition probabilities and posterior probabilities of being in a given state. We call a bin *modified* if  
1 the posterior probability of being in that state is  $> 0.5$  and *unmodified* otherwise.

## 2 Multivariate Hidden Markov Model

3 Given  $N$  individual ChIP-seq samples with states *unmodified* and *modified*, the number of possible combinatorial  
4 states is  $2^N$ . Let  $\mathbf{x}_t$  be the vector of  $N$  read counts for the  $t$ -th bin. The probability of observing a random vector  
5  $\mathbf{x}_t$  can be written as a mixture distribution of  $2^N$  components:

$$P(\mathbf{x}_t|\theta) = \sum_{i=1}^{2^N} \gamma_i f_i(\mathbf{x}_t, \theta_i) \quad (4)$$

6 Again, the  $\gamma_i$  denote the mixing weights and  $\theta_i$  denote the component density parameters for each component  
7  $i$ . We assume that the marginal densities of the multivariate count distributions  $f_i$  are given by the univariate  
8 distributions described in the previous section. A convenient way to construct a multivariate distribution from  
9 known marginal (univariate) distributions is copula theory (Sklar, 1959; Heinig et al., 2015).

10 Under the assumption of a Gaussian copula, the multivariate emission density for combinatorial state  $i$  can be  
11 written as

$$f_i(\mathbf{x}_t) = \prod_{j=1}^N f_{i,j}(x_{j,t}) \times |\Sigma_i|^{-1/2} \exp \left\{ -\frac{\mathbf{z}_{i,t} (\Sigma_i^{-1} - \mathbf{I}) \mathbf{z}_{i,t}^T}{2} \right\}, \quad (5)$$

$$\text{with } \mathbf{z}_{i,t} = [\phi^{-1}(F_{i,1}(x_{1,t})), \phi^{-1}(F_{i,2}(x_{2,t})), \dots, \phi^{-1}(F_{i,N}(x_{N,t}))], \quad (6)$$

12 where  $f_{i,j}$  are the marginal density functions for combinatorial state  $i$  and  $\Sigma_i$  is the correlation matrix between  
13 the transformed read counts  $z_{i,t} = \phi^{-1}(F_i(x_t))$ . The cumulative distribution function (CDF) of  $f_{i,j}$  is denoted  
14 by  $F_{i,j}$ , while  $\phi^{-1}$  denotes the inverse of the CDF of a standard normal (Renard and Lang, 2007).

15 The correlation matrix  $\Sigma_i$  for a given multivariate (combinatorial) state  $i$  is computed as follows: From  
16 the combination of univariate state calls (*unmodified* or *modified*) of all samples, we pick those bins that show  
17 combinatorial state  $i$ . The read counts  $\mathbf{x}_{t \in i}$  in those bins are transformed to  $\mathbf{z}_{t \in i}$  using equation 6 and  $\Sigma_i$  is  
18 calculated from the transformed read counts.

19 Similarly to the univariate Hidden Markov Model, we use the Baum-Welch algorithm to obtain a best fit for  
20 the transition probabilities and posterior probabilities of being in a given state. However, the emission densities  
21 remain fixed in the multivariate case. We assign a combinatorial state to each bin by maximizing over the posterior  
22 probabilities.

## 23 Data Acquisition

24 ChIP-seq data for the hematopoietic data (GSE60103) was downloaded from the Gene Expression Omnibus  
25 (GEO) and aligned to mouse reference mm9 following the procedure in (Lara-Astiaso et al., 2014) with bowtie2  
26 (version 2.2.3) (Langmead and Salzberg, 2012), keeping only reads that mapped to a unique location. The number  
27 of identical reads at each genomic position was restricted to 3. For the expression analysis, we used the provided  
1 RNA-seq data (GSE60101). We normalized the read counts by transcript length and scaled them to 1M reads.

2 To reduce the effect of extreme expression values, we applied an arc-sinh transformation on the data.

## 3 Multivariate peak-calling

4 chromstaR was run with a bin size of 1000bp and convergence threshold of  $eps = 0.01$  for both the univariate and  
 5 multivariate part. Univariate fits were checked manually for proper convergence and rerun with different random  
 6 initial parameter settings where necessary. For all analysis and comparisons, we excluded replicates SRR1521819,  
 7 SRR1521851 and SRR1521852 (corresponding to CD8-H3K27ac-Rep1, MF-H3K4me1-Rep1, MF-H3K4me1-Rep2)  
 8 because we could not obtain a proper fit with our method, regardless of initial parameter settings. Replicates were  
 9 included in the chromstaR analysis as separate ChIP-seq experiments but forced to yield the same state calls see  
 10 "Inclusion of replicates" below). Likewise, ChromHMM was run with a bin size of 1000bp, 16 states, parallel mode,  
 11 assembly mm9 and default parameters otherwise. Signal input files for ChromHMM were produced by adding  
 12 the read counts over replicates. MACS2 (version 2.1.0.20150731) was run with parameters "-g mm -keep-dup all"  
 13 and default settings otherwise. Replicates were specified separately and handled by MACS2 internally. For the  
 14 comparison with chromstaR and ChromHMM, MACS2 calls were transformed into a 1000bp-bin representation  
 15 by simply extending each peak into its overlapping bin(s). chromstaR and ChromHMM were run on chromosomes  
 16 1-19 and X, MACS2 was run with all scaffolds but only chromosomes 1-19 and X retained for analysis.

## 17 Analysis

18 Genomic coordinates were downloaded with biomaRt (Durinck et al., 2005, 2009) (dataset=mmusculus\_gene\_ensembl,  
 19 host=aug2010.archive.ensembl.org) and the first three basepairs of each gene were defined as coordinates for the  
 20 transcription start site. For the overlap of chromatin states with genes (Fig. 3b) we included the promoter  
 21 region defined as 2kb upstream of each gene in the gene definition. Gene ontology enrichment was performed with  
 22 GREAT (McLean et al., 2010) using the whole genome as background set. Significant terms were filtered out  
 23 with the following thresholds: BinomFdrQ < 0.05, HyperFdrQ < 0.1, RegionFoldEnrich > 2. Presented terms in  
 24 all tables are from category "GO Biological Process" and ordered by BinomFdrQ with the most significant results  
 25 on top.

## 26 Enrichment profiles around TSS

27 We calculated sensitivity (recall), precision and F1-score for the detection of expressed TSS based on the following  
 28 assumptions: True positives are expressed TSS which are called into the promoter state ([me1/2/3+ac] for  
 29 chromstaR, E7 and E9 for ChromHMM, [me1/3] and [me3] for MACS2, see Fig. 4). False negatives are expressed  
 30 TSS which are not assigned into the promoter state. True negatives are non-expressed TSS which are not assigned  
 31 into the promoter state. False positives are non-expressed TSS which are assigned the promoter state. We found  
 32 that chromstaR has a higher sensitivity than the other methods and a lower precision. The F1-score is highest  
 1 for chromstaR (Table 2).



|           | sensitivity | precision | F1-score |
|-----------|-------------|-----------|----------|
| chromstaR | 0.77        | 0.95      | 0.85     |
| MACS2     | 0.60        | 0.98      | 0.75     |
| ChromHMM  | 0.59        | 0.98      | 0.73     |

Table 2: Performance for detecting expressed TSS.

## 2 Analysis of human Hippocampus tissue

3 Bed-files for Hippocampus tissue were downloaded from “ftp://ftp.genboree.org/EpigenomeAtlas/Current-Release/sample-  
4 experiment/” for donors number 112 and 149. Histone marks H3K27ac, H3K27me3, H3K36me3, H3K4me1,  
5 H3K4me3, H3K9ac, H3K9me3 were analyzed at bin size 1000bp with convergence threshold of  $\epsilon = 0.01$  and  
6 donors 112 and 149 included as replicates. We found 21 out of  $2^7 = 128$  possible states (genomic frequency  
7  $\geq 0.1\%$ ) covering more than 99% of the genome (Fig. S3).

## 8 Univariate approximation of multivariate state distribution

9 chromstaR offers the possibility to restrict the number of combinatorial states to any number lower than  $2^N$ , where  
10  $N$  is the number of ChIP-seq experiments. Because the first step of the chromstaR workflow is a univariate peak  
11 calling, we can combine those peak calls into combinatorial states and use their ranking to determine which states  
12 to use for the multivariate peak-calling. Because most systems seem to be sparse in their combinatorial patterns,  
13 i.e. do not utilize the full combinatorial state space, it is often not necessary to run the multivariate part with all  
14  $2^N$  combinations. For instance, for the human Hippocampus tissue with 7 marks, running the multivariate with  
15 only 30 instead of 128 states recovers 98.2% of correct state assignments compared to the full 128 state model,  
16 and choosing 60 instead of 128 states recovers already 99.5% of correct state assignments compared to the full  
17 128 state model (Fig. S10).

## 18 Inclusion of replicates

19 The chromstaR formalism offers an elegant way to include replicates. For a single ChIP-seq experiment, there are  
20 two states - unmodified (background) and modified (peaks). For an arbitrary number of  $N$  experiments, there  
21 are thus  $2^N$  combinatorial states. The same is true for an arbitrary number of replicates  $R$ , which would yield  
22  $2^R$  combinatorial states. However, in the case of replicates, the number of states can be fixed to 2, such that all  
23 replicates are forced to have the same state in all replicates (e.g. either peak or background). Treating replicates  
24 in this way allows to find the most likely state for each position considering information from all replicates without  
1 prior merging.

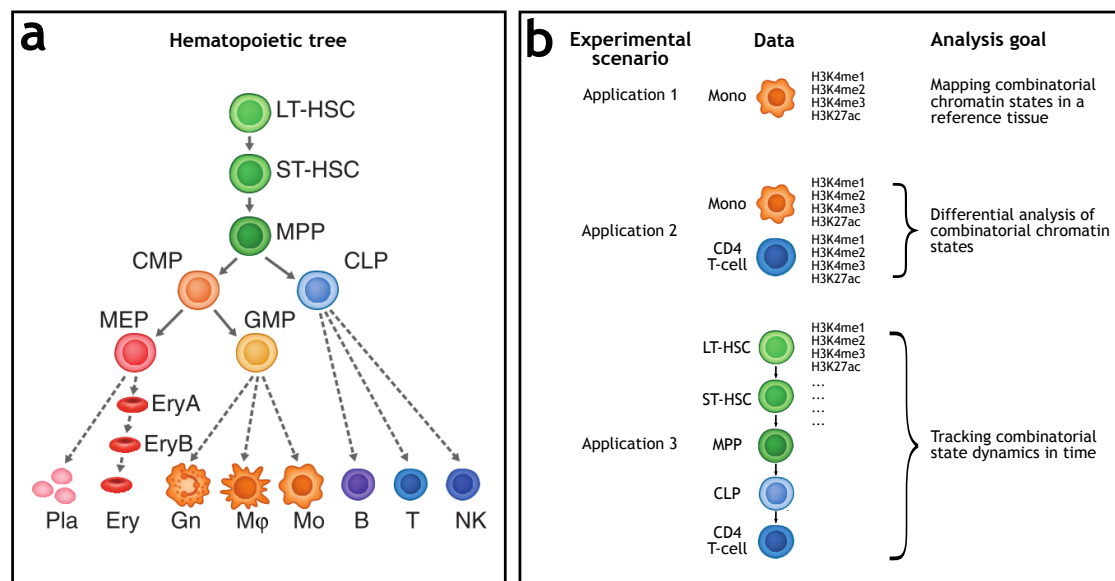

Figure S1: (a) Hematopoietic tree with cells that were probed by Lara-Astiaso et al. (2014). (b) Three experimental scenarios that are investigated in this manuscript.

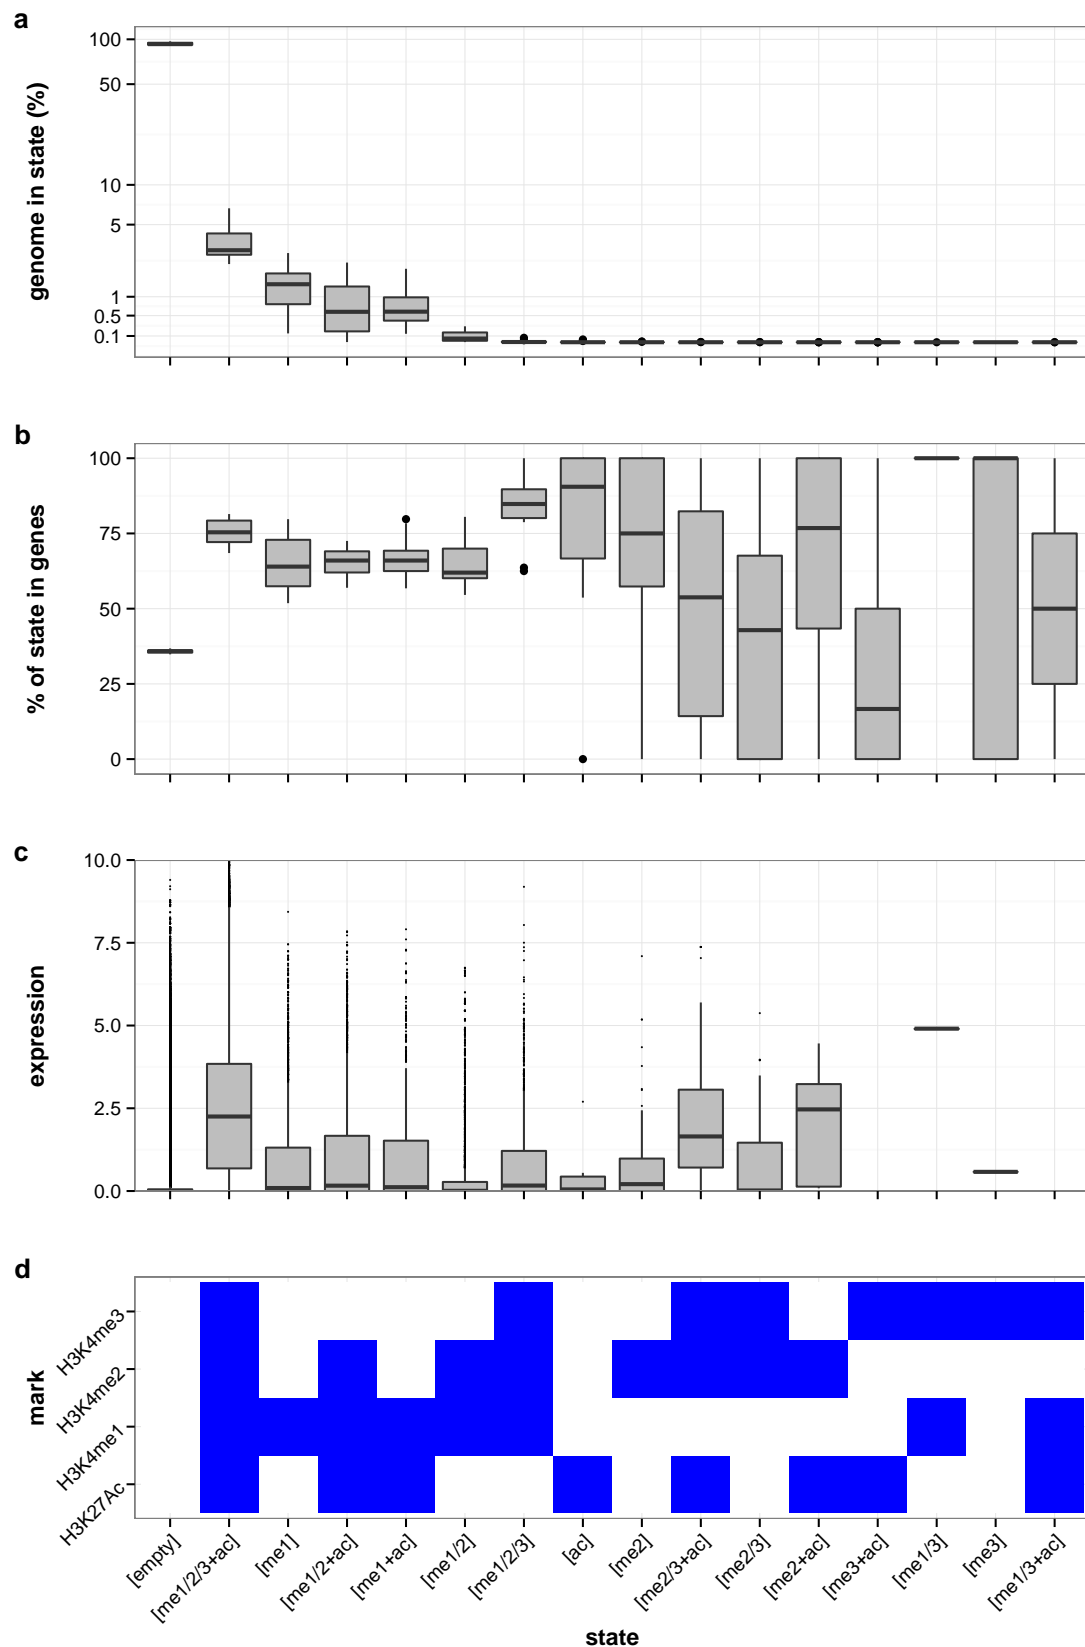

Figure S2: Boxplots depict values for all 16 measured hematopoietic cell types from Lara-Astiaso et al. (2014). (a) Genomic frequency, i.e. the percentage of the genome that is covered by the chromatin state. (b) Overlap with known genes. (c) Expression levels of genes whose TSS overlaps the chromatin state. (d) Heatmap showing the chromatin state definition (blue is present, white is absent).

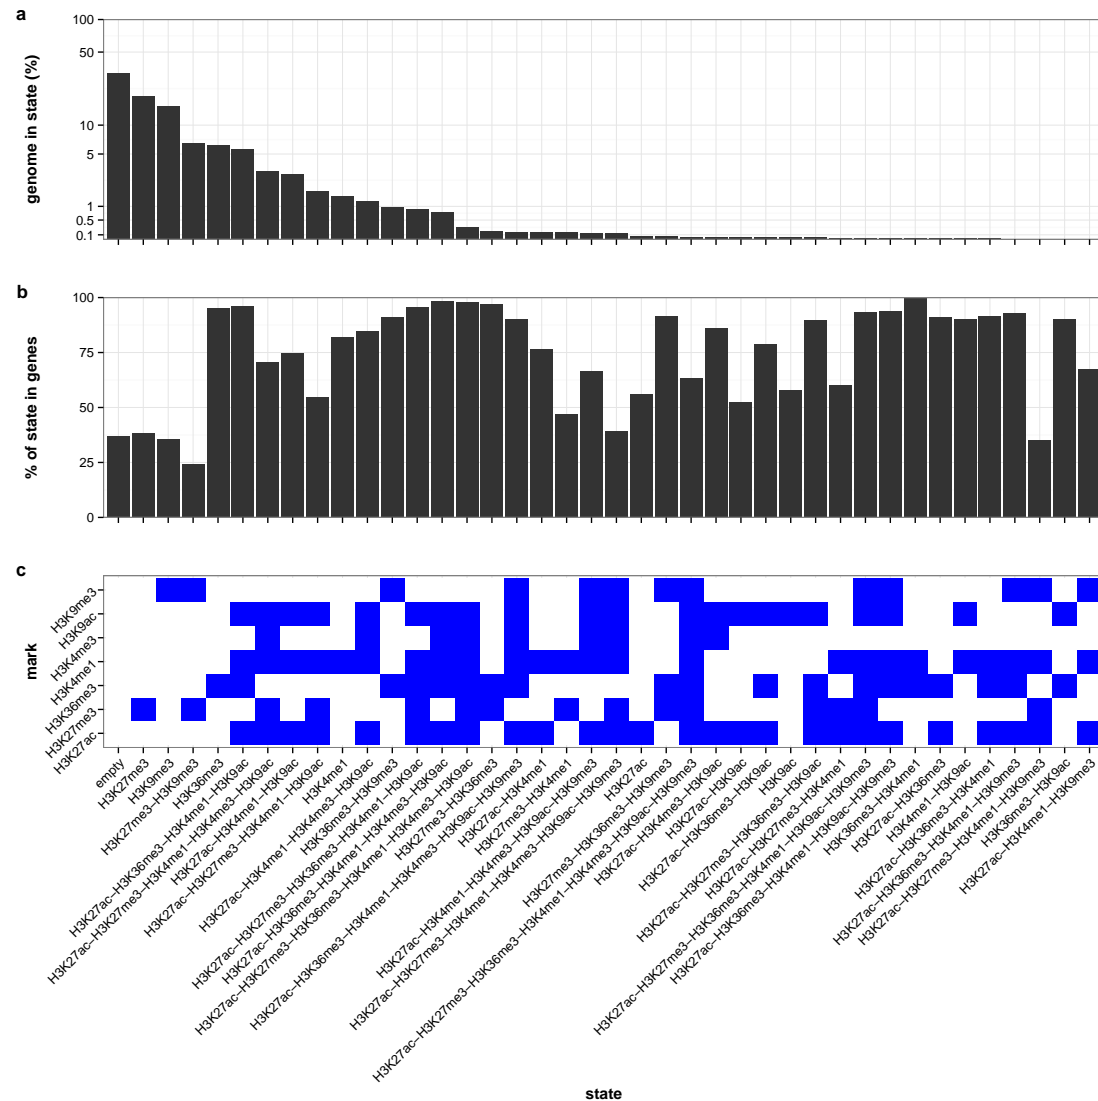

Figure S3: **Chromatin states in human Hippocampus tissue.** (a) Genomic frequency, i.e. the percentage of the genome that is covered by the chromatin state, for the 40 most frequent states. (b) Overlap with known genes. (c) Heatmap showing the chromatin state definition.

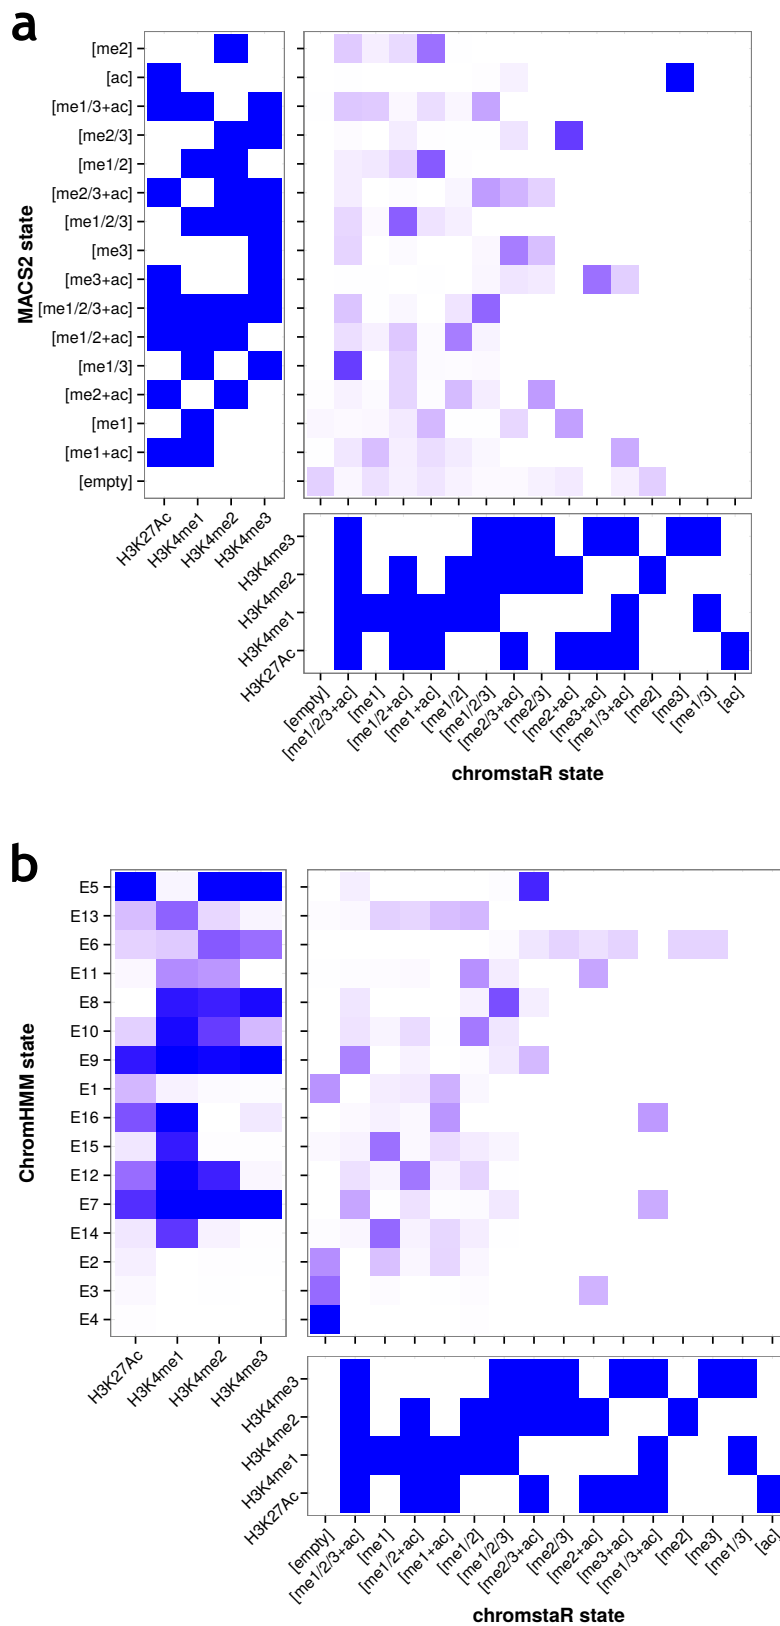

Figure S4: Confusion matrix for the comparison of chromstaR with (a) MACS2 and (b) ChromHMM. The confusion matrix shows the fold enrichment of states from both methods with each other, with darker tiles (blue) indicating a higher overlap.

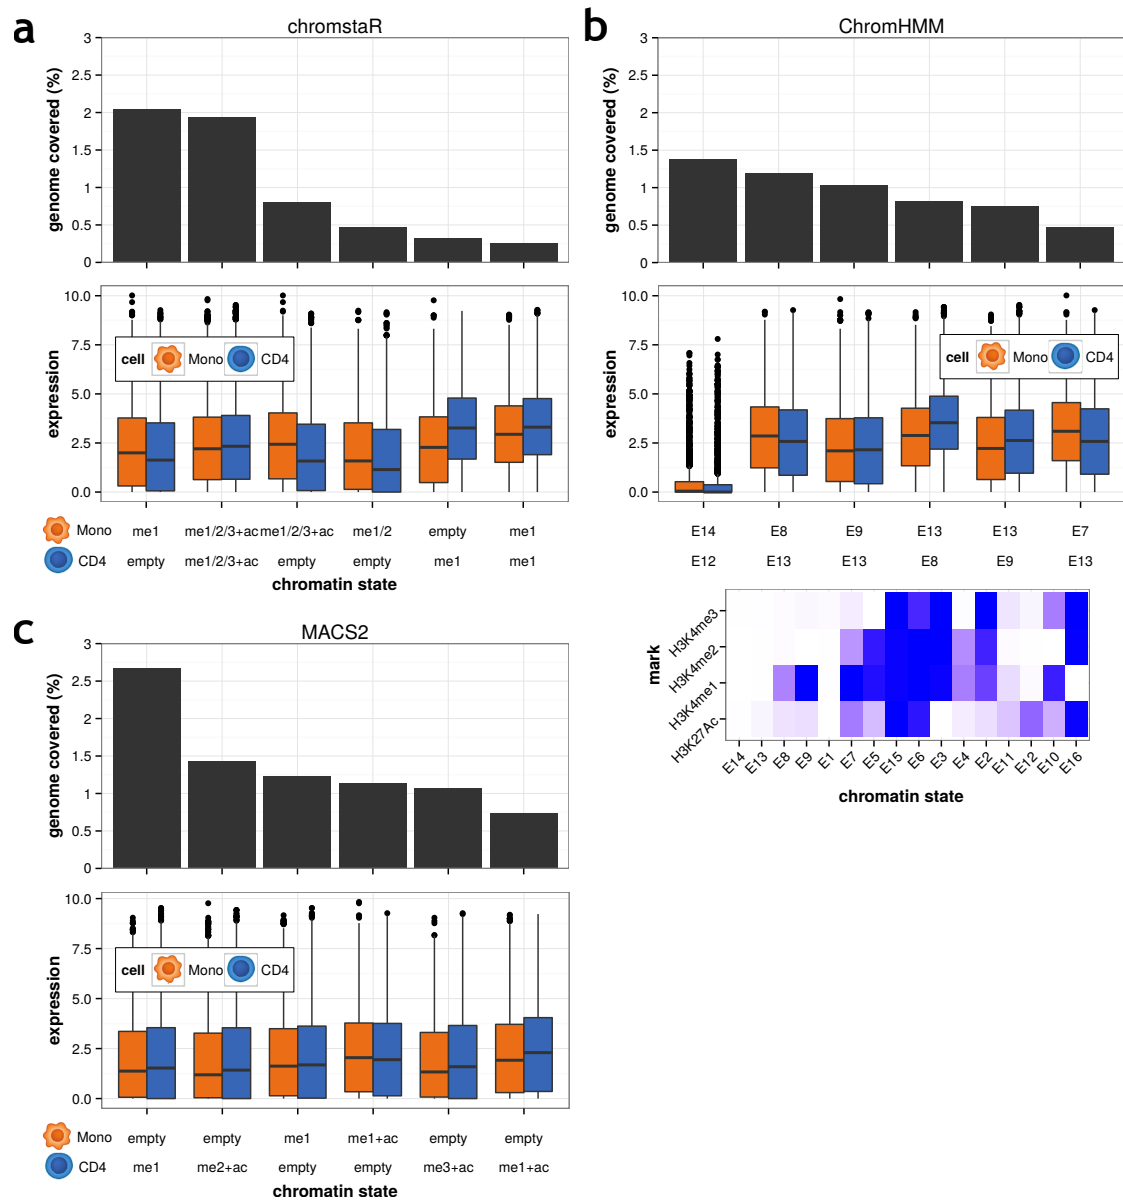

Figure S5: **Differential analysis of monocytes and CD4 T-cells.** Genomic frequency and expression levels for genes that overlap the 6 most frequent differential chromatin states for (a) chromstaR, (b) ChromHMM and (c) MACS2.

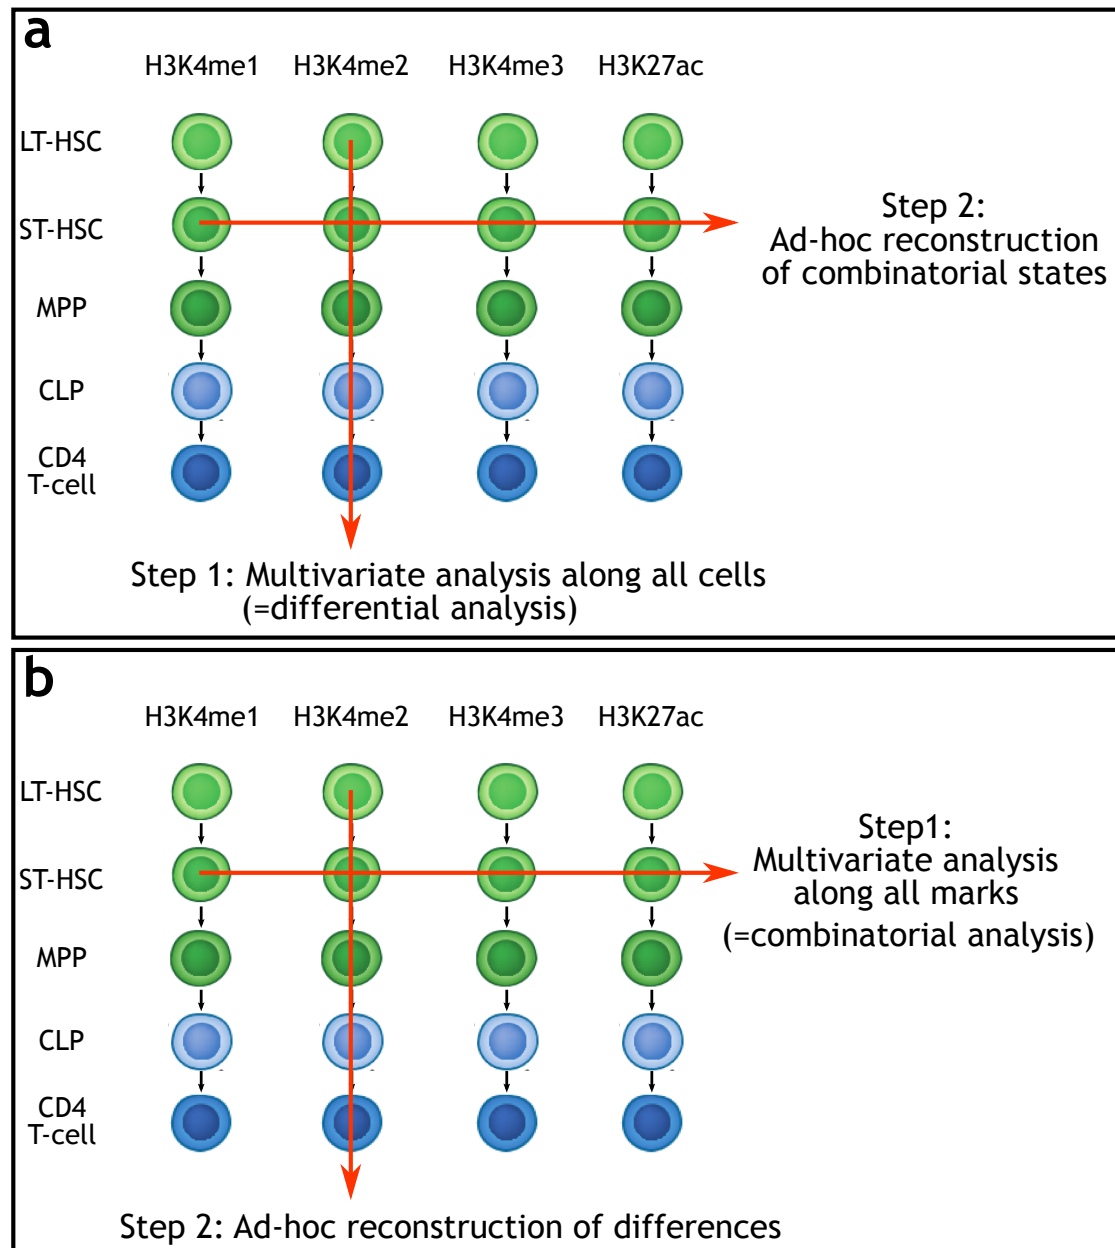

Figure S6: **Two-step approach for inferring combinatorial state differences.** (a) In a first step, multivariate peak-calls are obtained along all cells for each mark separately (differential analysis). Those calls are then combined, ad-hoc, into the combinatorial states. (b) In a first step, combinatorial states are obtained for each cell using the multivariate approach. Differences between those states are then obtained by a simple comparison between cells.

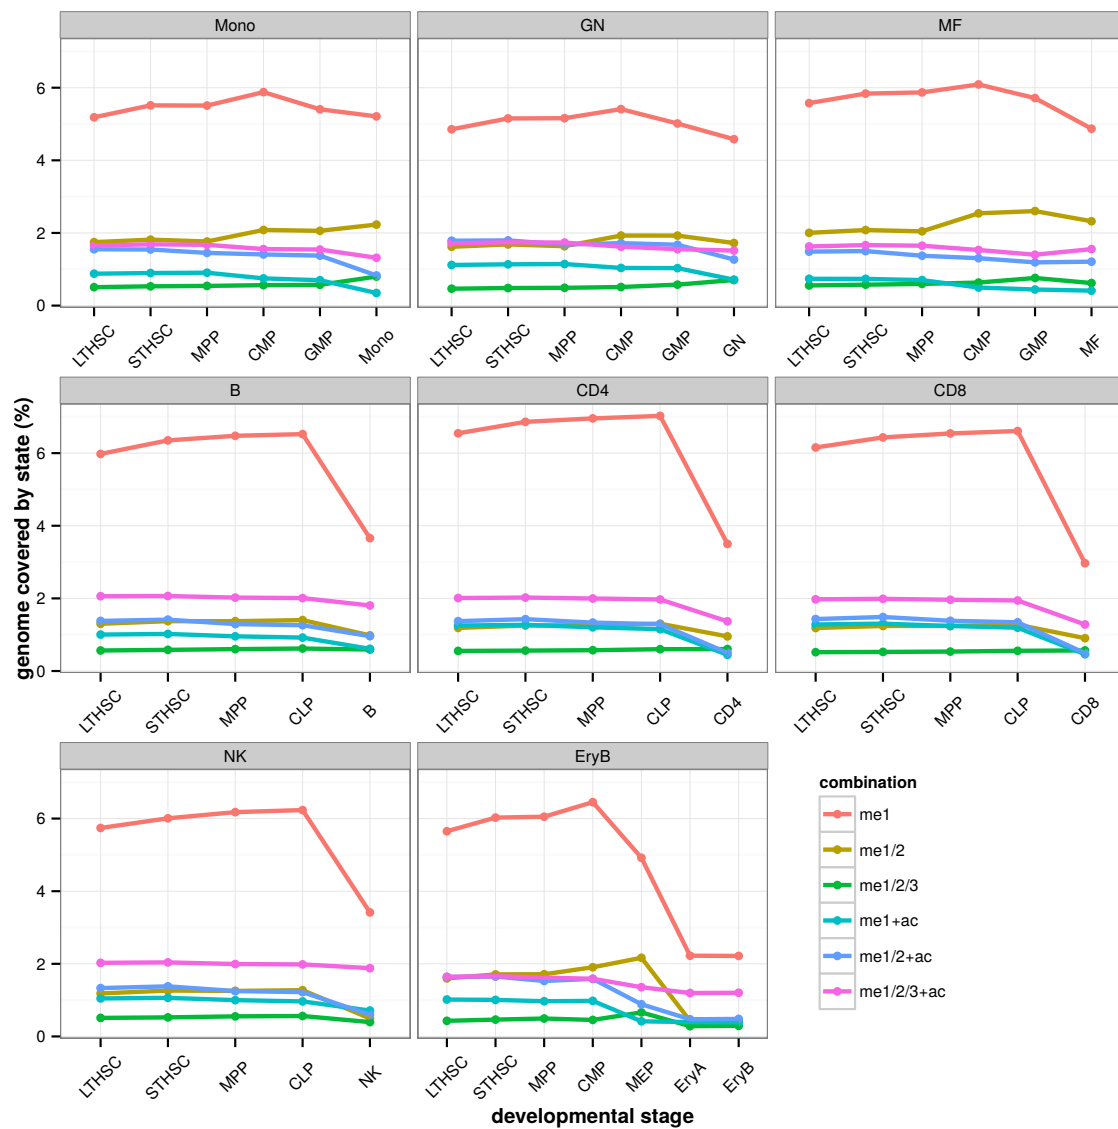

Figure S7: Genomic frequency of combinatorial states during differentiation for all branches of the hematopoietic tree (Fig. S1a).



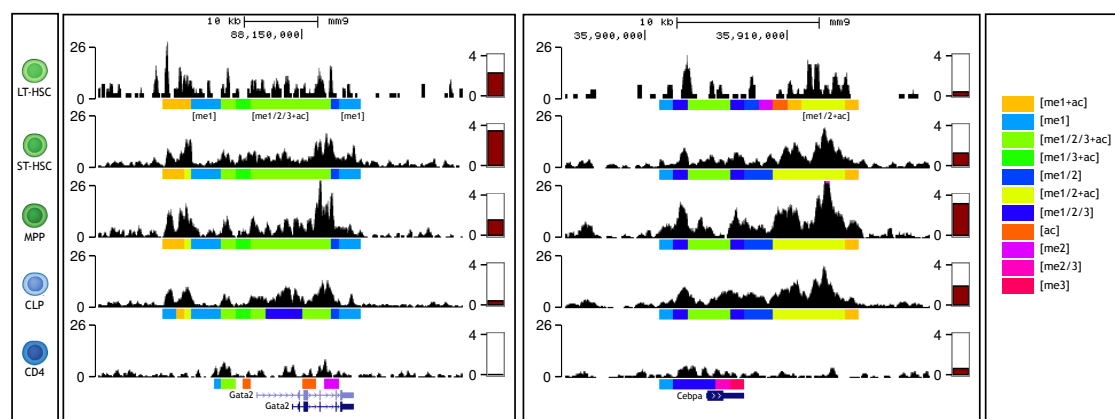

Figure S8: **Chromatin state transitions at (a) Gata2 and (b) Cebpa.** Black genome browser tracks show H3K4me1 levels and combinatorial chromatin states as determined by chromstaR below. Red bars on the right of each track indicate normalized expression levels of Gata2 and Cebpa, respectively. Both Gata2 and Cebpa are involved in maintenance of pluripotency in stem cells and transition from an open into a closed chromatin configuration during differentiation.

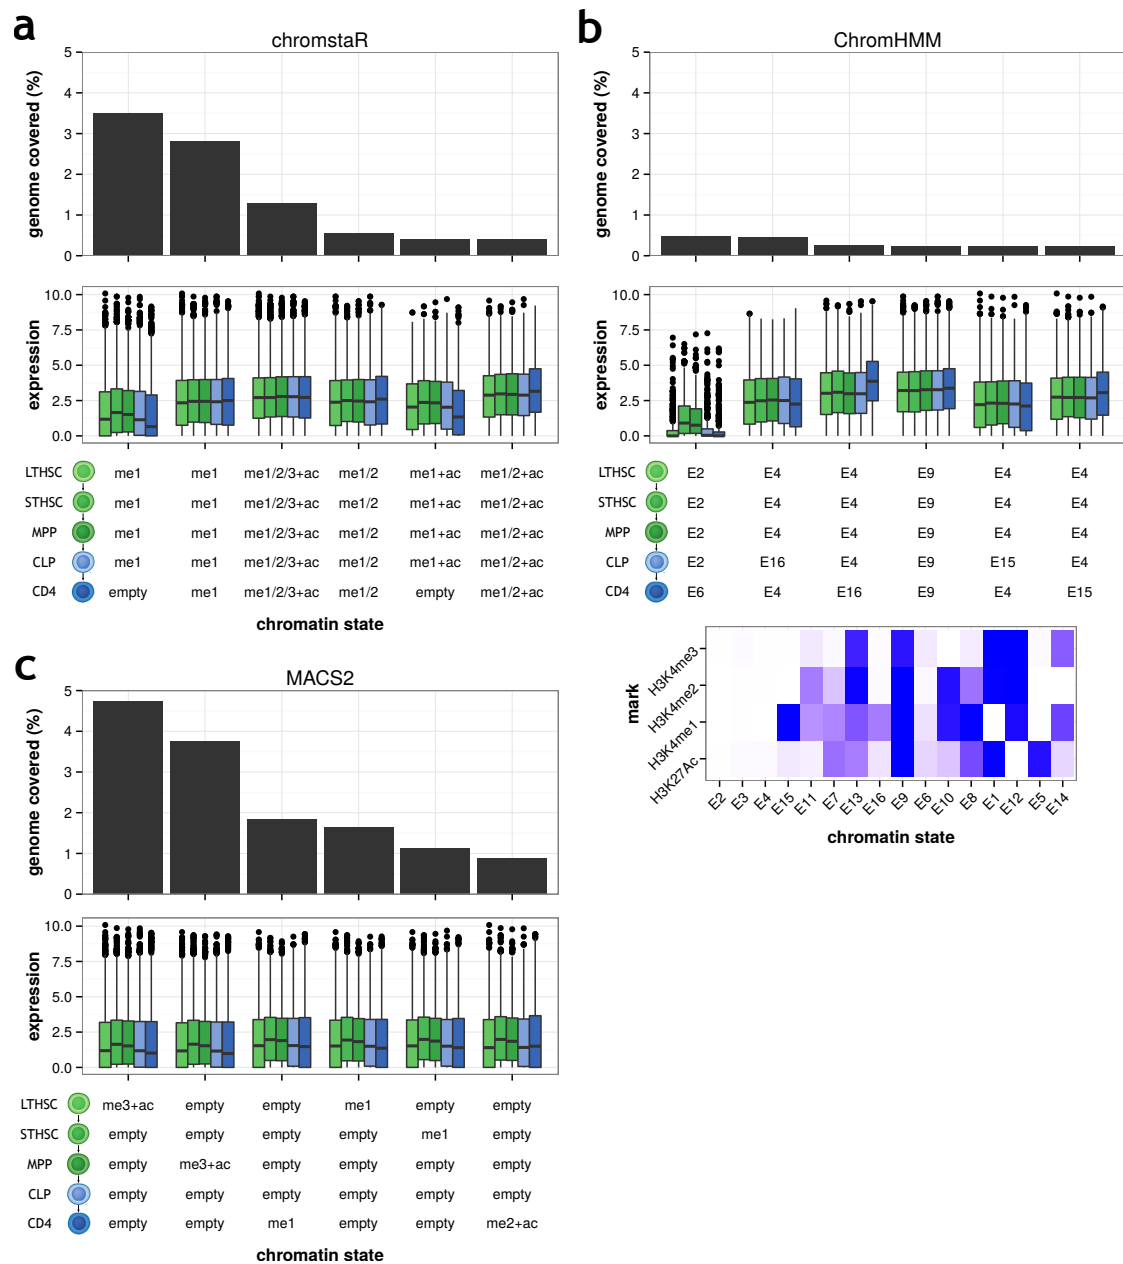

Figure S9: **Chromatin state transitions for the CD4 branch.** Genomic frequency and expression levels for genes that overlap the 6 most frequent chromatin state transitions for (a) chromstaR, (b) ChromHMM and (c) MACS2.

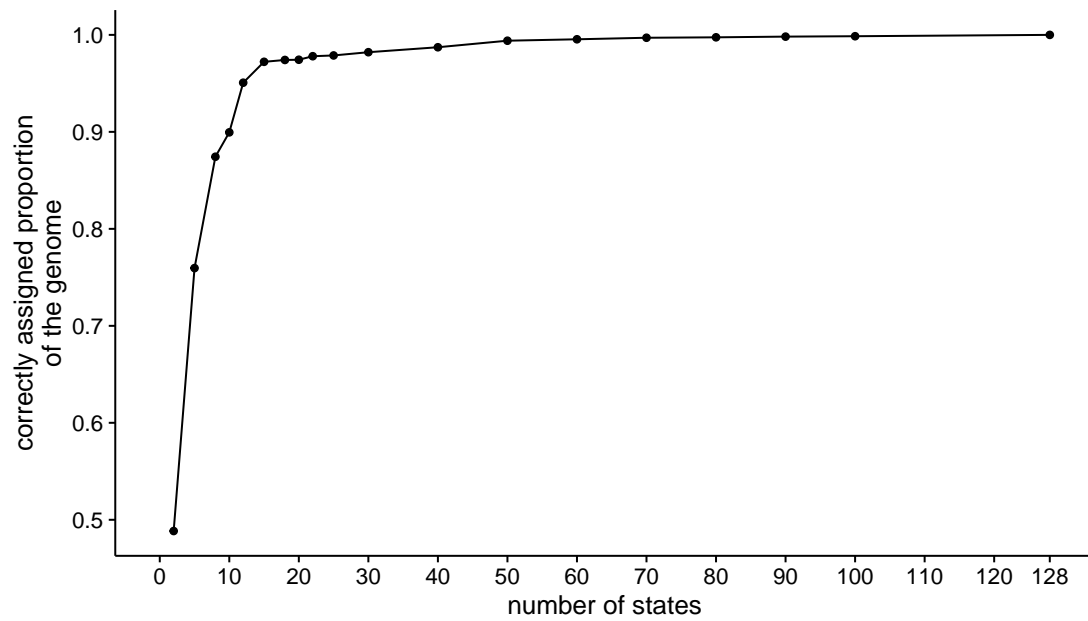

Figure S10: **Approximation of multivariate state distribution with less than  $2^N$  states.** For the Hippocampus data with 7 marks there are  $2^7 = 128$  possible combinatorial states (last data point). The figure shows the proportion of the genome that is correctly assigned compared to the full 128-state model (y-axis) if the multivariate is run with fewer than 128 states (x-axis).



| Mono | empty | empty  | empty | me1   | me1+ac                              | empty  | empty                                                    | empty  | empty  |
|------|-------|--------|-------|-------|-------------------------------------|--------|----------------------------------------------------------|--------|--------|
| CD4  | me1   | me2+ac | me1   | empty | empty                               | me3+ac | me1+ac                                                   | me1+ac | me1+ac |
| 1    |       |        |       |       | myeloid cell differentiation        |        | T cell activation                                        |        |        |
| 2    |       |        |       |       | homeostasis of number of cells      |        | T cell differentiation                                   |        |        |
| 3    |       |        |       |       | cytokine-mediated signaling pathway |        | alpha-beta T cell activation                             |        |        |
| 4    |       |        |       |       | myeloid cell homeostasis            |        | alpha-beta T cell differentiation                        |        |        |
| 5    |       |        |       |       | erythrocyte homeostasis             |        | T cell activation involved in immune response            |        |        |
| 6    |       |        |       |       | erythrocyte differentiation         |        | leukocyte activation involved in immune response         |        |        |
| 7    |       |        |       |       | B cell differentiation              |        | lymphocyte activation involved in immune response        |        |        |
| 8    |       |        |       |       | Ras protein signal transduction     |        | T cell selection                                         |        |        |
| 9    |       |        |       |       | myeloid leukocyte differentiation   |        | T cell proliferation                                     |        |        |
| 10   |       |        |       |       | myeloid leukocyte activation        |        | positive regulation of myeloid leukocyte differentiation |        |        |

Table S2: The first 10 gene ontology terms for selected differential regions between monocytes and CD4 T-cells after analysis with MACS2. Only significant terms are shown.

| Mono | E14                                                          | E8                                           | E9                                                  |
|------|--------------------------------------------------------------|----------------------------------------------|-----------------------------------------------------|
| CD4  | E12                                                          | E13                                          | E13                                                 |
| 1    | homophilic cell adhesion                                     | immune system process                        | intrinsic apoptotic signaling pathway               |
| 2    | neuron recognition                                           | response to biotic stimulus                  | apoptotic mitochondrial changes                     |
| 3    | axon choice point recognition                                | response to other organism                   | myeloid cell homeostasis                            |
| 4    | axon midline choice point recognition                        | leukocyte activation                         | nuclear export                                      |
| 5    | negative chemotaxis                                          | immune response                              | B cell differentiation                              |
| 6    | startle response                                             | cell activation                              | regulation of intrinsic apoptotic signaling pathway |
| 7    | olfactory bulb interneuron differentiation                   | immune system development                    | response to starvation                              |
| 8    | innervation                                                  | positive regulation of immune system process | regulation of mitochondrial membrane permeability   |
| 9    | gamma-aminobutyric acid signaling pathway                    | response to bacterium                        | fatty acid biosynthetic process                     |
| 10   | corticospinal tract morphogenesis                            | immune effector process                      | erythrocyte homeostasis                             |
| Mono | E13                                                          | E13                                          | E7                                                  |
| CD4  | E8                                                           | E9                                           | E13                                                 |
| 1    | leukocyte activation                                         | T cell activation                            | immune system process                               |
| 2    | cell activation                                              | intra-Golgi vesicle-mediated transport       | response to biotic stimulus                         |
| 3    | hematopoietic or lymphoid organ development                  | peptidyl-lysine modification                 | response to other organism                          |
| 4    | chromatin modification                                       | macromolecule methylation                    | regulation of immune system process                 |
| 5    | protein modification by small protein conjugation or removal | protein methylation                          | leukocyte activation                                |
| 6    | immune system development                                    | protein acylation                            | multi-organism process                              |
| 7    | lymphocyte activation                                        | protein acetylation                          | cell activation                                     |
| 8    | protein modification by small protein conjugation            | regulation of B cell activation              | immune response                                     |
| 9    | hemopoiesis                                                  | internal protein amino acid acetylation      | response to bacterium                               |
| 10   | protein ubiquitination                                       | ncRNA processing                             | myeloid leukocyte activation                        |

Table S3: The first 10 gene ontology terms for selected differential regions between monocytes and CD4 T-cells after analysis with chromHMM. Only significant terms are shown.



|       |                                                                 |                                             |                                     |       |            |            |
|-------|-----------------------------------------------------------------|---------------------------------------------|-------------------------------------|-------|------------|------------|
| LTHSC | mel/2/3+ac                                                      | mel/2/3+ac                                  | empty                               | empty | mel/2/3+ac | mel/2/3+ac |
| STHSC | mel/2/3+ac                                                      | mel/2/3+ac                                  | empty                               | empty | mel/2/3+ac | mel/2/3+ac |
| MPP   | mel/2/3+ac                                                      | mel/2/3+ac                                  | empty                               | empty | empty      | empty      |
| CLP   | mel/2/3+ac                                                      | mel/2/3+ac                                  | empty                               | empty | empty      | empty      |
| CD4   | mel/2/3+ac                                                      | empty                                       | mel/2/3+ac                          | empty | empty      | mel/2/3+ac |
| 1     | protein folding                                                 | immune system process                       | T cell differentiation              |       |            |            |
| 2     | GPI anchor metabolic process                                    | immune response                             | lymphocyte differentiation          |       |            |            |
| 3     | GPI anchor biosynthetic process                                 | homeostasis of number of cells              | lymphocyte activation               |       |            |            |
| 4     | apoptotic mitochondrial changes                                 | immune system development                   | immune system process               |       |            |            |
| 5     | nuclear export                                                  | regulation of immune response               | T cell activation                   |       |            |            |
| 6     | intrinsic apoptotic signaling pathway in response to DNA damage | hematopoietic or lymphoid organ development | T cell selection                    |       |            |            |
| 7     | protein lipidation                                              | B cell activation                           | T cell receptor V(D)J recombination |       |            |            |
| 8     | positive regulation of mRNA catabolic process                   | leukocyte activation                        | leukocyte activation                |       |            |            |
| 9     | vacuole organization                                            | hemopoiesis                                 | positive T cell selection           |       |            |            |
| 10    | regulation of nuclear-transcribed mRNA catabolic process        | myeloid leukocyte differentiation           | leukocyte differentiation           |       |            |            |

Table S5: The first 10 gene ontology terms for selected regions in the CD4 T-cells lineage after analysis with chromstaR. Only significant terms are shown.



## 2 References

- 3 Amin, V., Harris, R. A., Onuchic, V., Jackson, A. R., Charnecki, T., Paithankar, S., Lakshmi Subramanian,  
4 S., Riehle, K., Coarfa, C., and Milosavljevic, A., *et al.*, 2015. Epigenomic footprints across 111 refer-  
5 ence epigenomes reveal tissue-specific epigenetic regulation of lincRNAs. *Nature Communications*, **6**(May  
6 2014):6370.
- 7 Andersson, R., Gebhard, C., Miguel-Escalada, I., Hoof, I., Bornholdt, J., Boyd, M., Chen, Y., Zhao, X., Schmidl,  
8 C., Suzuki, T., *et al.*, 2014. An atlas of active enhancers across human cell types and tissues. *Nature*,  
9 **507**(7493):455–61.
- 10 Barski, A., Cuddapah, S., Cui, K., Roh, T.-Y., Schones, D. E., Wang, Z., Wei, G., Chepelev, I., and Zhao, K.,  
11 2007. High-resolution profiling of histone methylations in the human genome. *Cell*, **129**(4):823–37.
- 12 Baum, L. E., Petrie, T., Soules, G., and Weiss, N., 1970. A Maximization Technique Occurring in the Statistical  
13 Analysis of Probabilistic Functions of Markov Chains. *The Annals of Mathematical Statistics*, **41**(1):164–171.
- 14 Bernstein, B. E., Birney, E., Dunham, I., Green, E. D., Gunter, C., and Snyder, M., 2012. An integrated  
15 encyclopedia of DNA elements in the human genome. *Nature*, **489**(7414):57–74.
- 16 Bernstein, B. E., Kamal, M., Lindblad-Toh, K., Bekiranov, S., Bailey, D. K., Huebert, D. J., McMahon, S.,  
17 Karlsson, E. K., Kulbokas, E. J., Gingeras, T. R., *et al.*, 2005. Genomic maps and comparative analysis of  
18 histone modifications in human and mouse. *Cell*, **120**(2):169–81.
- 19 Bernstein, B. E., Stamatoyannopoulos, J. A., Costello, J. F., Ren, B., Milosavljevic, A., Meissner, A., Kellis, M.,  
20 Marra, M. A., Beaudet, A. L., Ecker, J. R., *et al.*, 2010. The NIH Roadmap Epigenomics Mapping Consortium.  
21 *Nature biotechnology*, **28**(10):1045–8.
- 22 Biesinger, J., Wang, Y., and Xie, X., 2013. Discovering and mapping chromatin states using a tree hidden Markov  
23 model. *BMC bioinformatics*, **14 Suppl 5**:S4.
- 1 Consortium, R. E., Kundaje, A., Meuleman, W., Ernst, J., Bilenky, M., Yen, A., Heravi-Moussavi, A., Kherad-

pour, P., Zhang, Z., Wang, J., *et al.*, 2015. Integrative analysis of 111 reference human epigenomes. *Nature*,  
**518**:317–330.

Dixon, J. R., Jung, I., Selvaraj, S., Shen, Y., Antosiewicz-Bourget, J. E., Lee, A. Y., Ye, Z., Kim, A., Rajagopal,  
N., Xie, W., *et al.*, 2015. Chromatin architecture reorganization during stem cell differentiation. *Nature*,  
**518**(7539):331–336.

Durinck, S., Moreau, Y., Kasprzyk, A., Davis, S., De Moor, B., Brazma, A., and Huber, W., 2005. BioMart  
and Bioconductor: a powerful link between biological databases and microarray data analysis. *Bioinformatics*  
(Oxford, England), **21**(16):3439–40.

Durinck, S., Spellman, P. T., Birney, E., and Huber, W., 2009. Mapping identifiers for the integration of genomic  
datasets with the R/Bioconductor package biomaRt. *Nature protocols*, **4**(8):1184–91.

Ernst, J. and Kellis, M., 2010. Discovery and characterization of chromatin states for systematic annotation of  
the human genome. *Nature biotechnology*, **28**(8):817–25.

Ernst, J. and Kellis, M., 2012. ChromHMM: automating chromatin-state discovery and characterization. *Nature*  
*methods*, **9**(3):215–216.

Gentleman, R. C., Carey, V. J., Bates, D. M., Bolstad, B., Dettling, M., Dudoit, S., Ellis, B., Gautier, L.,  
Ge, Y., Gentry, J., *et al.*, 2004. Bioconductor: open software development for computational biology and  
bioinformatics. *Genome biology*, **5**(10):R80.

Heinig, M., Colomé-Tatché, M., Taudt, A., Rintisch, C., Schafer, S., Pravenec, M., Hubner, N., Vingron, M., and  
Johannes, F., 2015. histoneHMM: Differential analysis of histone modifications with broad genomic footprints.  
*BMC Bioinformatics*, **16**(1):60.

Heintzman, N. D., Hon, G. C., Hawkins, R. D., Kheradpour, P., Stark, A., Harp, L. F., Ye, Z., Lee, L. K., Stuart,  
R. K., Ching, C. W., *et al.*, 2009. Histone modifications at human enhancers reflect global cell-type-specific  
gene expression. *Nature*, **459**(7243):108–12.

2 Hoffman, M. M., Buske, O. J., Wang, J., Weng, Z., Bilmes, J. A., and Noble, W. S., 2012. Unsupervised pattern  
3 discovery in human chromatin structure through genomic segmentation. *Nature methods*, **9**(5):473–6.

4 Hoffman, M. M., Ernst, J., Wilder, S. P., Kundaje, A., Harris, R. S., Libbrecht, M., Giardine, B., Ellenbogen,  
5 P. M., Bilmes, J. a., Birney, E., *et al.*, 2013. Integrative annotation of chromatin elements from ENCODE  
6 data. *Nucleic acids research*, **41**(2):827–41.

7 Huber, W., Carey, V. J., Gentleman, R., Anders, S., Carlson, M., Carvalho, B. S., Bravo, H. C., Davis, S.,  
8 Gatto, L., Girke, T., *et al.*, 2015. Orchestrating high-throughput genomic analysis with Bioconductor. *Nature*  
9 *Methods*, **12**(2):115–121.

10 Huda, A., Mariño-Ramírez, L., and Jordan, I. K., 2010. Epigenetic histone modifications of human transposable  
11 elements: genome defense versus exaptation. *Mobile DNA*, **1**(1):2.

12 Jenuwein, T. and Allis, C. D., 2001. Translating the histone code. *Science (New York, N.Y.)*, **293**(5532):1074–80.

13 Kharchenko, P. V., Alekseyenko, A. A., Schwartz, Y. B., Minoda, A., Riddle, N. C., Ernst, J., Sabo, P. J.,  
14 Larschan, E., Gorchakov, A. A., Gu, T., *et al.*, 2011. Comprehensive analysis of the chromatin landscape in  
15 *Drosophila melanogaster*. *Nature*, **471**(7339):480–5.

16 Koch, C. M., Andrews, R. M., Flicek, P., Dillon, S. C., Karaöz, U., Clelland, G. K., Wilcox, S., Beare, D. M.,  
17 Fowler, J. C., Couttet, P., *et al.*, 2007. The landscape of histone modifications across 1% of the human genome  
18 in five human cell lines. *Genome research*, **17**(6):691–707.

19 Langmead, B. and Salzberg, S. L., 2012. Fast gapped-read alignment with Bowtie 2. *Nature methods*, **9**(4):357–9.

20 Lara-Astiaso, D., Weiner, A., Lorenzo-Vivas, E., Zaretzky, I., Jaitin, D. A., David, E., Keren-Shaul, H., Mildner,  
21 A., Winter, D., Jung, S., *et al.*, 2014. Chromatin state dynamics during blood formation. *Science (New York,*  
22 *N.Y.)*, **55**(233348):1–10.

23 Lawrence, M., Huber, W., Pagès, H., Aboyoun, P., Carlson, M., Gentleman, R., Morgan, M. T., and Carey, V. J.,  
1 2013. Software for computing and annotating genomic ranges. *PLoS computational biology*, **9**(8):e1003118.

- 2 Leung, D., Jung, I., Rajagopal, N., Schmitt, A., Selvaraj, S., Lee, A. Y., and Yen, C.-a., 2015. Integrative analysis  
3 of haplotype-resolved epigenomes across human tissues. *Nature*, **518**:350–354.
- 4 Luo, C., Sidote, D. J., Zhang, Y., Kerstetter, R. A., Michael, T. P., and Lam, E., 2013. Integrative analysis  
5 of chromatin states in Arabidopsis identified potential regulatory mechanisms for natural antisense transcript  
6 production. *The Plant journal : for cell and molecular biology*, **73**(1):77–90.
- 7 McLean, C. Y., Bristor, D., Hiller, M., Clarke, S. L., Schaar, B. T., Lowe, C. B., Wenger, A. M., and Bejerano, G.,  
8 2010. GREAT improves functional interpretation of cis-regulatory regions. *Nature biotechnology*, **28**(5):495–  
9 501.
- 10 Mikkelsen, T. S., Ku, M., Jaffe, D. B., Issac, B., Lieberman, E., Giannoukos, G., Alvarez, P., Brockman, W., Kim,  
11 T.-K., Koche, R. P., *et al.*, 2007. Genome-wide maps of chromatin state in pluripotent and lineage-committed  
12 cells. *Nature*, **448**(7153):553–60.
- 13 Pokholok, D. K., Harbison, C. T., Levine, S., Cole, M., Hannett, N. M., Lee, T. I., Bell, G. W., Walker, K., Rolfe,  
14 P. A., Herbolsheimer, E., *et al.*, 2005. Genome-wide map of nucleosome acetylation and methylation in yeast.  
15 *Cell*, **122**(4):517–27.
- 16 Rashid, N. U., Giresi, P. G., Ibrahim, J. G., Sun, W., and Lieb, J. D., 2011. ZINBA integrates local covariates  
17 with DNA-seq data to identify broad and narrow regions of enrichment, even within amplified genomic regions.  
18 *Genome biology*, **12**(7):R67.
- 19 Renard, B. and Lang, M., 2007. Use of a Gaussian copula for multivariate extreme value analysis: Some case  
20 studies in hydrology. *Advances in Water Resources*, **30**(4):897–912.
- 21 Rintisch, C., Heinig, M., Bauerfeind, A., Schafer, S., Mieth, C., Patone, G., Hummel, O., Chen, W., Cook, S.,  
22 Cuppen, E., *et al.*, 2014. Natural variation of histone modification and its impact on gene expression in the  
23 rat genome. *Genome research*, **24**(6):942–53.
- 1 Robertson, G., Hirst, M., Bainbridge, M., Bilenky, M., Zhao, Y., Zeng, T., Euskirchen, G., Bernier, B., Varhol,

2 R., Delaney, A., *et al.*, 2007. Genome-wide profiles of STAT1 DNA association using chromatin immunopre-  
3 cipitation and massively parallel sequencing. *Nature methods*, **4**(8):651–7.

4 Roudier, F., Ahmed, I., Bérard, C., Sarazin, A., Mary-Huard, T., Cortijo, S., Bouyer, D., Caillieux, E., Duvernois-  
5 Berthet, E., Al-Shikhley, L., *et al.*, 2011. Integrative epigenomic mapping defines four main chromatin states  
6 in Arabidopsis. *The EMBO Journal*, **30**(10):1928–1938.

7 Sklar, M., 1959. Fonctions de répartition à n dimensions et leurs marges. .

8 Sohn, K.-A., Ho, J. W. K., Djordjevic, D., Jeong, H.-H., Park, P. J., and Kim, J. H., 2015. hiHMM: Bayesian  
9 non-parametric joint inference of chromatin state maps. *Bioinformatics (Oxford, England)*, :btv117–.

10 Spyrou, C., Stark, R., Lynch, A. G., and Tavaré, S., 2009. BayesPeak: Bayesian analysis of ChIP-seq data. *BMC*  
11 *bioinformatics*, **10**:299.

12 van der Graaf, A., Wardenaar, R., Neumann, D. A., Taudt, A., Shaw, R. G., Jansen, R. C., Schmitz, R. J., Colomé-  
13 Tatché, M., and Johannes, F., 2015. Rate, spectrum, and evolutionary dynamics of spontaneous epimutations.  
14 *Proceedings of the National Academy of Sciences of the United States of America*, **112**(21):6676–81.

15 Wang, Z., Zang, C., Rosenfeld, J. A., Schones, D. E., Barski, A., Cuddapah, S., Cui, K., Roh, T.-Y., Peng, W.,  
16 Zhang, M. Q., *et al.*, 2008. Combinatorial patterns of histone acetylations and methylations in the human  
17 genome. *Nature genetics*, **40**(7):897–903.

18 Yen, A. and Kellis, M., 2015. Systematic chromatin state comparison of epigenomes associated with diverse  
19 properties including sex and tissue type. *Nature Communications*, **6**:7973.

20 Zeng, X., Sanalkumar, R., Bresnick, E. H., Li, H., Chang, Q., and Keleş, S., 2013. jMOSAICS: joint analysis of  
21 multiple ChIP-seq datasets. *Genome biology*, **14**(4):R38.

22 Zhang, Y., Liu, T., Meyer, C. A., Eeckhoutte, J., Johnson, D. S., Bernstein, B. E., Nusbaum, C., Myers, R. M.,  
859 Brown, M., Li, W., *et al.*, 2008. Model-based analysis of ChIP-Seq (MACS). *Genome biology*, **9**(9):R137.
